1 **Research article**

2  
3  
4 **Progressive axonopathy when oligodendrocytes lack the myelin protein CMTM5**

5  
6  
7 Tobias J. Buscham<sup>1</sup>, Maria A. Eichel-Vogel<sup>1</sup>, Anna M. Steyer<sup>1,2</sup>, Olaf Jahn<sup>3,4</sup>,  
8 Nicola Strenzke<sup>5</sup>, Rakshit Dardawal<sup>6</sup>, Tor R. Memhave<sup>6</sup>, Sophie B. Siems<sup>1</sup>, Christina Müller<sup>7</sup>,  
9 Martin Meschkat<sup>1,8</sup>, Ting Sun<sup>1</sup>, Torben Ruhwedel<sup>1,2</sup>, Wiebke Möbius<sup>1,2</sup>,  
10 Eva-Maria Krämer-Albers<sup>7</sup>, Susann Boretius<sup>6</sup>, Klaus-Armin Nave<sup>1</sup> and Hauke B. Werner<sup>1,\*</sup>

11  
12  
13 **Affiliations**

14 <sup>1</sup>Department of Neurogenetics, Max Planck Institute of Experimental Medicine, 37075 Göttingen, Germany

15 <sup>2</sup>Electron Microscopy Core Unit, Max Planck Institute of Experimental Medicine, 37075 Göttingen, Germany

16 <sup>3</sup>Proteomics Group, Max Planck Institute of Experimental Medicine, 37075 Göttingen, Germany

17 <sup>4</sup>Translational Neuroproteomics Group, Department of Psychiatry and Psychotherapy, University Medical Center  
18 Göttingen, Georg-August-University, 37075 Göttingen, Germany

19 <sup>5</sup>Institute for Auditory Neuroscience, University Medicine Göttingen, 37075 Göttingen, Germany

20 <sup>6</sup>Functional Imaging Laboratory, German Primate Center, Leibniz Institute for Primate Research 37077 Göttingen,  
21 Germany

22 <sup>7</sup>Institute of Developmental Biology and Neurobiology, Johannes Gutenberg University, 55128 Mainz, Germany

23 <sup>8</sup>Abberior Instruments GmbH, 37077 Göttingen, Germany

24  
25  
26 **\*Corresponding author**

27 Dr. Hauke Werner

28 Max Planck Institute of Experimental Medicine

29 Department of Neurogenetics

30 Hermann-Rein-Str. 3; D-37075 Göttingen, Germany

31 Tel.: +49 (551) 3899-759

32 E-Mail: [Hauke@em.mpg.de](mailto:Hauke@em.mpg.de)

33  
34  
35 **Keywords**

36 Oligodendrocyte; myelin sheath; axon-glia interaction; axon degeneration; neuropathology;  
37 focused ion beam-scanning electron microscopy (FIB-SEM); differential myelin proteome  
38 analysis

39  
40 **Reviewer login information to the proteome data repository:**

41 **Project:** Progressive axonopathy when oligodendrocytes lack the myelin protein CMTM5

42 **Project accession:** PXD029443

43 **Reviewer account:** Username: reviewer\_pxd029443@ebi.ac.uk; Password: 2nTEI47v

44  
45 **Word and figure count**

46 3548 words (main text); 7 main figures; 6 supplemental figures, 2 tables

47

48

49 **Abstract**

50

51 Oligodendrocytes facilitate rapid impulse propagation along the axons they myelinate and  
52 support their long-term integrity. However, the functional relevance of many myelin proteins  
53 has remained unknown. Here we find that expression of the tetraspan-transmembrane protein  
54 CMTM5 (Chemokine-like factor-like MARVEL-transmembrane domain containing protein 5) is  
55 highly enriched in oligodendrocytes and CNS myelin. Genetic disruption of the *Cmtm5*-gene  
56 in oligodendrocytes of mice does not impair the development or ultrastructure of CNS myelin.  
57 However, oligodendroglial *Cmtm5*-deficiency causes an early-onset progressive axonopathy,  
58 which we also observe in global and in tamoxifen-induced oligodendroglial *Cmtm5*-mutants.  
59 Presence of the *Wd<sup>s</sup>* mutation ameliorates the axonopathy, implying a Wallerian degeneration-  
60 like pathomechanism. These results indicate that CMTM5 is involved in the function of  
61 oligodendrocytes to maintain axonal integrity rather than myelin biogenesis.

62

63

## 64 Introduction

65  
66 Myelination of axons by oligodendrocytes enables rapid, saltatory conduction of signals in the  
67 vertebrate central nervous system (CNS) (Cohen et al., 2020; Hartline & Colman, 2007; Tasaki,  
68 1939). Additionally, oligodendrocytes support the long-term preservation of axons  
69 metabolically (Fünfschilling et al., 2012; Lee et al., 2012; Philips et al., 2021; Saab et al., 2016)  
70 and via extracellular vesicles (Chamberlain et al., 2021; Frühbeis et al., 2020; Mukherjee et  
71 al., 2020). In fact, myelin pathology in CNS disorders such as leukodystrophies, multiple  
72 sclerosis and respective animal models is commonly associated with axonal degeneration  
73 (Franklin et al., 2012; Stadelmann et al., 2019; Wolf et al., 2021). Oligodendrocytes are thus  
74 required to maintain axonal integrity and ultimately CNS function. However, oligodendrocytes  
75 express thousands of transcripts (Jäkel et al., 2019; Zhang et al., 2014; Zhou et al., 2020) and  
76 myelin comprises hundreds of proteins (Ishii et al., 2009; Jahn et al., 2020), and our knowledge  
77 remains limited with respect to which molecules contribute to myelin biogenesis, axonal  
78 support, or both.

79  
80 We recently found that a member of the chemokine-like factor-like MARVEL-transmembrane  
81 containing (CMTM) protein family, CMTM6, is expressed in Schwann cells, the myelinating  
82 cells of the peripheral nervous system (PNS), and that its deletion in mice affects the diameters  
83 and function of peripheral axons (Eichel et al., 2020). Based on this finding we asked if a  
84 member of the CMTM family is expressed in oligodendrocytes, which may thus fulfill a similar  
85 function in the CNS. The CMTM protein family comprises eight members in humans (Han et  
86 al., 2003) that have mostly been associated with mediating tumor immunity (Burr et al., 2017;  
87 Mezzadra et al., 2017; Shao et al., 2007; Xiao et al., 2015; Yuan et al., 2020).

88  
89 In this study we focused on *Cmtm5* considering (i) its expression in oligodendrocytes according  
90 to bulk RNAseq data (Zhang et al., 2014), (ii) the finding that the *Cmtm5* gene promoter drives  
91 expression of Cre recombinase in oligodendrocytes (Gong et al., 2007), and (iii) the mass  
92 spectrometric identification of CMTM5 in CNS myelin (Jahn et al., 2020). By structure  
93 prediction, CMTM5 comprises four transmembrane domains with small intracellular N- and C-  
94 terminal domains and two small extracellular loops (Jumper et al., 2021) but, its name  
95 notwithstanding, no apparent chemokine-like sequence motif. Here we assess the functional  
96 relevance of CMTM5 in oligodendrocytes. We find that CMTM5 is not required for normal  
97 myelination or axonal diameters in the CNS. However, our data indicate that CMTM5 is  
98 involved in the function of oligodendrocytes to maintain the integrity of CNS axons.

99

## 100 **Results**

101

### 102 **Expression of CMTM5 is enriched in oligodendrocytes and CNS myelin**

103 We explored the hypothesis that CNS myelin comprises a homolog of the recently identified  
104 (Eichel et al., 2020) PNS myelin protein CMTM6. Indeed, previous mass spectrometric  
105 analysis identified CMTM5 (Chemokine-like factor-like MARVEL-transmembrane domain-  
106 containing family member-5) in myelin purified from the brains of C57/Bl6 mice (Jahn et al.,  
107 2020). In contrast, neither CMTM6 nor any other member of the protein family was detected in  
108 CNS myelin. Correspondingly, published RNA sequencing data (Zhang et al., 2014)  
109 demonstrate that mature oligodendrocytes (MOL) display substantial abundance of *Cmtm5*  
110 mRNA but not of any other gene family member (**Figure 1–Supplement 1A**). Indeed, *Cmtm5*  
111 mRNA is enriched in the oligodendrocyte lineage, in which its abundance increases with  
112 differentiation from the progenitor (OPC) stage to the MOL stage (**Figure 1–Supplement 1B**).  
113 When evaluating mRNA abundance according to published scRNA-seq data (Jäkel et al.,  
114 2019; Zhou et al., 2020), MOL (as annotated by high-level expression of myelin basic protein  
115 mRNA, *MBP/Mbp*) express *CMTM5/Cmtm5* mRNA in both humans and mice (**Figure 1–**  
116 **Supplement 1C-F**).

117

118 To independently confirm CMTM5 as a myelin protein, we first used immunoblotting to assess  
119 its abundance in myelin biochemically purified from mouse brains in comparison to equal  
120 amounts of mouse brain lysate. One band was detected at the expected molecular weight of  
121 18 kDa. Indeed, the abundance of CMTM5 was markedly higher in the myelin-enriched fraction  
122 than in brain lysates (**Figure 1A**), similar to the myelin markers PLP, CNP and SIRT2. Confocal  
123 imaging of immunolabeled spinal cord sections revealed CMTM5 in CNS myelin of c57Bl/6N  
124 mice (**Figure 1B**). Importantly, no labeling was found when analyzing corresponding sections  
125 of newly generated conditional mouse mutants with a deletion of the *Cmtm5* gene in in  
126 myelinating cells (*Cmtm5<sup>fl/fl</sup>\*Cnp<sup>Cre/WT</sup>*, also termed cKO; see below) (**Figure 1B**). By  
127 immunoblotting of homogenized wild-type mouse brains, the abundance of CMTM5 increased  
128 coinciding with myelin formation and maturation between postnatal days 15 (P15) and P24  
129 (**Figure 1C**). In adult mouse brains between 6 and 24 months (m) of age, the abundance of  
130 CMTM5 remained unchanged (**Figure 1C**). The abundance of CMTM5 in purified myelin also  
131 remained essentially constant (**Figure 1D**). Taken together, expression of CMTM5 in the CNS  
132 is largely limited to oligodendrocytes and enriched in CNS myelin.

133

### 134 **CMTM5 is not essential for myelin biogenesis and composition**

135 To assess the functional relevance of the expression of *Cmtm5* by oligodendrocytes, we  
136 generated mouse mutants with a conditional deletion of the gene selectively in myelinating

137 cells (*Cmtm5<sup>fl/fl</sup>\*Cnp<sup>Cre/WT</sup>*, also termed cKO). Conditional mutants were born at expected  
138 frequencies, and cKO mice showed no obvious behavioral phenotype. We biochemically  
139 purified myelin from brains of cKO mice and respective controls at P75 and further examined  
140 if CMTM5-deficiency affects the protein composition of myelin. By immunoblotting, CMTM5  
141 was readily detected in myelin purified from the brains of control mice but undetectable in  
142 *Cmtm5* cKO myelin (**Figure 2A**). By label-free quantitative proteome analysis, *Cmtm5* cKO  
143 mice displayed a largely similar myelin proteome composition as control mice (**Figure 2B,B'**).  
144 As an exception, CMTM5 was undetectable in myelin purified from the brains of *Cmtm5* cKO  
145 mice, and the relative abundance of CNP was approximately halved as previously shown for  
146 the utilized *Cnp<sup>Cre/WT</sup>* driver mice owing to heterozygosity of the *Cnp* gene (Erwig, et al., 2019;  
147 Lappe-Siefke et al., 2003).

148  
149 To examine if loss of CMTM5 affects the biogenesis and ultrastructure of myelin, we used  
150 transmission electron microscopy to assess optic nerves dissected from cKO and control mice  
151 at P30 and P75 (**Figure 2C-L**). By morphometry, we did not observe signs of hypomyelination  
152 (**Figure 2D,I**) or myelin pathology such as myelin outfoldings, inner tongue swellings or lamella  
153 splittings (**Figure 2E,J**). The thickness of myelin sheaths, as determined by the g-ratio, was  
154 also virtually the same in cKO and control mice (**Figure 2F-G, K-L**). By immunohistochemistry,  
155 *Cmtm5* cKO mice displayed an unaltered number of cells immunopositive for carbonic  
156 anhydrase 2 (CAII), a marker for mature oligodendrocytes (**Figure 2M,N**). We then used  
157 magnetic resonance imaging (MRI) to assess the brains of 8-months old *Cmtm5* cKO and  
158 respective control mice. However, no apparent differences in brain morphometry and diffusivity  
159 were found in various white and gray matter areas (**Figure 2-Supplement 1**). Together, these  
160 data imply that expression of CMTM5 by oligodendrocytes is not essential for the normal  
161 biogenesis, ultrastructure or protein composition of CNS myelin.

### 162 163 ***Cmtm5* deletion in oligodendrocytes causes early-onset progressive axonopathy and** 164 **late-onset general neuropathology**

165 Considering that the diameters of peripheral axons are increased when Schwann cells lack  
166 CMTM6 (Eichel et al., 2020), we asked whether the diameters of CNS axons are altered when  
167 oligodendrocytes lack CMTM5. Yet, the quantitative assessment of transmission electron  
168 micrographs did not reveal abnormal axonal diameters in the optic nerves of cKO mice (**Figure**  
169 **3-Supplement 1A,B**). Axonal diameters were also normal in mice lacking CMTM5 in all cells  
170 (*Cmtm5<sup>-/-</sup>*) compared to respective controls (**Figure 3-Supplement 1C**).

171  
172 However, in the course of this analysis we noted a considerable number of pathological-  
173 appearing axonal profiles. When quantifying these profiles at three different ages, we found

174 their frequency to increase over time in the optic nerves of *Cmtm5* cKO compared to control  
175 mice (**Figure 3A,B**). Pathological profiles were evident in *Cmtm5* cKO optic nerves already at  
176 P30, and their number progressively increased toward 1 year of age, the oldest analyzed  
177 timepoint. We observed a trend toward a reduced number of axons in *Cmtm5* cKO mice at  
178 P30 and P75 that reached significance at 1 year of age (**Figure 3C**). This implies that the  
179 observed axonal pathology ultimately leads to axonal loss. To test whether *Cmtm5* cKO mice  
180 display pathological profiles also in other white matter tracts, we used electron microscopy to  
181 assess the dorsal white matter in spinal cords at 1 year of age. Indeed, the number of  
182 pathological profiles was increased several-fold in *Cmtm5* cKO compared to control mice  
183 (**Figure 3D,E**), indicating that the observed axonopathy is not restricted to the optic nerve.

184

185 We then used magnetic resonance spectroscopy (MRS) to determine the concentrations of  
186 the metabolites myo-Inositol and N-Acetyl-Aspartate (NAA), which are considered  
187 neuropathological markers reflecting gliosis and axonal degeneration respectively. We found  
188 the concentrations of myo-Inositol significantly increased in the corpus callosi of *Cmtm5* cKO  
189 compared to control mice at 8 months of age (**Figure 3-Supplement 2A**). *Cmtm5* cKO brains  
190 displayed a trend toward reduced concentrations of NAA, which did not reach significance  
191 (**Figure 3-Supplement 2B**). We considered that these findings may imply the emergence of  
192 general neuropathology in the CNS of *Cmtm5* cKO mice, which we then aimed to resolve  
193 temporally. To this aim we subjected the brains of *Cmtm5* cKO mice to immunohistochemistry  
194 at the ages of P30, P75 and 1 year. We immunolabeled axonal swellings (using antibodies  
195 against APP), astrocytes (using antibodies against GFAP) and microglia (using the markers  
196 IBA1/AIF1 and MAC3/LAMP2). For quantification, we selected the hippocampal fimbria as a  
197 relatively uniform white matter tract. At age P30 and P75 we found no genotype-dependent  
198 differences between *Cmtm5* cKO and control mice with respect to number of APP-  
199 immunopositive axonal swellings or the relative area of immunopositivity for GFAP, IBA1 or  
200 MAC3. At one year of age, however, all markers were significantly increased in *Cmtm5* cKO  
201 compared to control mice (**Figure 3-Supplement 3I-L**).

202

### 203 **Pathology of axon/myelin units by focused ion beam-scanning electron microscopy**

204 Considering that 2-dimensional visualization allows only limited insight into morphological  
205 features, we next assessed pathological profiles in the optic nerves of one year old *Cmtm5*  
206 cKO mice using 3-dimensional reconstruction of datasets gained by focused ion beam-  
207 scanning electron microscopy (**Figure 4**). We found that the numbers of myelin outfoldings,  
208 inner-tongue inclusions, and axoplasmic inclusions are not increased in *Cmtm5* cKO mice  
209 (**Figure 4A''-C''**). Interestingly, however, the number of myelin whorls are markedly increased  
210 in *Cmtm5* cKO mice (**Figure 4D''**). Myelin whorls are multilamellar structures that largely



211 display the periodicity of CNS myelin devoid of a discernible axon, probably best interpreted  
212 as remnants of degenerating myelinated fibers with relative sparing of myelin membranes  
213 (Edgar et al., 2009). These data indicate that axonal degeneration - but not myelin pathology  
214 such as myelin outfoldings or inner-tongue inclusions – emerges when oligodendrocytes lack  
215 CMTM5.

216

### 217 **Functional assessment of retinæ and optic nerves**

218 As a read-out for visual function, we first assessed retinal function by electroretinography  
219 (ERG) recordings from *Cmtm5* cKO and control mice at 34 weeks of age. ERG waveforms  
220 (**Figure 5A**), ERG thresholds (**Figure 5B**) and the amplitudes of the a- and b-waves (**Figure**  
221 **5C,D**) did not differ between the genotypes, indicating normal retinal function. However,  
222 visually evoked potentials (VEPs) implied that transmission of signals via the optic nerves to  
223 the visual cortex was impaired in *Cmtm5* cKO mice (**Figure 5E-H**). All mice displayed sizeable  
224 VEPs (**Figure 5E**) with normal thresholds (**Figure 5F**) and a normal VEP latency (**Figure 5G**),  
225 indicating normal speed of action potential propagation and probably reflecting normal  
226 myelination in the optic nerves. However, the VEP amplitudes were significantly reduced in  
227 *Cmtm5* cKO mice (**Figure 5H**), probably owing to the axonopathy (**Figure 3, 4**).

228

### 229 **Axonopathy in constitutive and tamoxifen-induced *Cmtm5*-mutants**

230 All results presented thus far are based on the analysis of mice in which the *Cmtm5* allele was  
231 recombined by Cre expressed in myelinating cells under control of the *Cnp* promoter.  
232 Importantly, the utilized heterozygous *Cnp*<sup>Cre/Wt</sup> driver mice (Lappe-Siefke et al., 2003) harbor  
233 only one functional *Cnp* allele. Notwithstanding that heterozygous *Cnp*<sup>Cre/Wt</sup> mice display  
234 neuropathology only at old age (Hagemeyer et al., 2012), we sought to test if *Cmtm5* mutant  
235 mice also display axonopathy on a homozygous wild-type *Cnp* gene background. To this aim  
236 we bred mice carrying a homozygous deletion of the *Cmtm5* gene in all cells (*Cmtm5*<sup>-/-</sup>, Knock-  
237 out; *Cmtm5*<sup>wt/wt</sup>, Control). As expected, CMTM5 was readily detectable by immunoblot in  
238 myelin purified from the brains of control mice but undetectable in *Cmtm5*<sup>-/-</sup> myelin. Importantly,  
239 the abundance of CNP appeared similar in *Cmtm5*<sup>-/-</sup> and *Cmtm5*<sup>wt/wt</sup> control myelin (**Figure**  
240 **6A**), as was that of the myelin marker SIRT2. *Vice versa*, the abundance of CMTM5 appeared  
241 similar by immunoblot analysis of purified from the brains of *Plp*<sup>-Y</sup> and *Cnp*<sup>-/-</sup> and respective  
242 control mice (**Figure 6-Supplement 1A,B**). Thus, the abundance of PLP and CNP in myelin  
243 does not depend on CMTM5 and *vice versa* the abundance of CMTM5 in myelin does not  
244 depend on PLP or CNP.

245

246 We then used conventional transmission electron microscopy to scrutinize optic nerves  
247 dissected from *Cmtm5*<sup>-/-</sup> mice. Notably, by quantitative assessment of electron micrographs

248 we found a progressive increase in the number of pathological profiles in *Cmtm5*<sup>-/-</sup> compared  
249 to control mice (**Figure 6B,C**), in similarity to *Cmtm5* cKO mice (**Figure 3**). Importantly, this  
250 indicates that the axonopathy that emerges when oligodendrocytes lack CMTM5 is  
251 independent of *Cnp* heterozygosity.

252

253 To rule out that the pathological profiles in *Cmtm5* mutant mice are the consequence of subtle  
254 developmental defects, we used the *Plp*<sup>CreERT2</sup> driver line (Leone et al., 2003) to induce  
255 recombination of the *Cmtm5* gene by injecting tamoxifen into adult *Cmtm5*<sup>fl/fl</sup>\**Plp*<sup>CreERT2</sup> mice  
256 (termed *Cmtm5* iKO in the following). Tamoxifen injected *Cmtm5*<sup>fl/fl</sup> mice served as controls.  
257 By immunoblot, the abundance of CMTM5 was greatly reduced in myelin purified from the  
258 brains of *Cmtm5* iKO mice four months after tamoxifen injection (4 mo PTI) (**Figure 6D**).  
259 Importantly, by quantitative assessment of electron micrographs, *Cmtm5* iKO mice displayed  
260 a significantly increased number of pathological profiles 4 mo PTI (**Figure 6E, F**). This indicates  
261 that continued oligodendroglial expression of CMTM5 in adult mice is required to prevent the  
262 emergence of axonopathy.

263

#### 264 **Axonopathy upon *Cmtm5* deletion is counteracted by the Wallerian degeneration slow** 265 **(*Wld<sup>s</sup>*) mutation**

266 To test if the axonopathy in *Cmtm5* mutants causes a decline in the number of neuronal cell  
267 bodies, we quantified retinal ganglion cells (RGC) in the retinae of *Cmtm5* cKO and control  
268 mice at 1 year of age (**Figure 7A-C**). We found that RGC numbers were similar, indicating that  
269 neuronal cell bodies are preserved. Considering that this finding may imply a Wallerian-type  
270 pathomechanism of axon degeneration (Coleman & Höke, 2020) we assessed if the presence  
271 of the *Wld<sup>s</sup>* mutation (Coleman et al., 1998; Lunn et al., 1989) affects the number of  
272 pathological profiles upon *Cmtm5* deficiency. Indeed, when we analyzed the optic nerves of  
273 *Cmtm5*<sup>-/-</sup> mice by transmission electron microscopy (TEM) at the age of 6 months, presence  
274 of the *Wld<sup>s</sup>* mutation markedly reduced the number of pathological profiles (**Figure 7D-E**). For  
275 comparison *Cmtm5*<sup>wt/wt</sup> mice displayed only a negligible number of pathological profiles,  
276 independent of the presence of the *Wld<sup>s</sup>* mutation. Together, these results imply a Wallerian-  
277 type pathomechanism of axonopathy when oligodendrocytes lack *Cmtm5*.

278

279



## 280 Discussion

281

282 We report the intriguing observation that mice lacking the CNS myelin protein CMTM5 display  
283 an early-onset progressive axonopathy, whereas the biogenesis and ultrastructure of myelin  
284 appear unaffected. According to previously established datasets, expression of *Cmtm5* in the  
285 CNS is highly enriched in myelinating oligodendrocytes (Jäkel et al., 2019; Zhang et al., 2014;  
286 Zhou et al., 2020). CMTM5 is not the first myelin protein associated with secondary axonal  
287 degeneration in mutant mice. However, different from the previously studied myelin genes *Plp1*  
288 (Edgar et al., 2004; Griffiths I et al., 1998; Lüders et al., 2019) and *Cnp* (Edgar et al., 2009;  
289 Lappe-Siefke et al., 2003), the encoded protein is of much lower abundance in the myelin  
290 sheath. By quantitative mass spectrometry, CMTM5 represents only 0.027% of the myelin  
291 proteome (Jahn et al., 2020), in comparison to 37.9% for PLP and 5.1% for CNP. The relative  
292 abundance of CMTM5 in myelin is thus roughly equivalent to that of other transmembrane-  
293 tetraspan proteins CD9 (0.06%), proteolipid GPM6B (0.04%) and the gap junction protein  
294 GJC3/Cx29 (0.02%) (Jahn et al., 2020), which were previously identified as low-abundant  
295 myelin constituents (Kagawa et al., 1997; Kleopa et al., 2004; Werner et al., 2013). Considering  
296 the low abundance of CMTM5 in myelin, it may not be unexpected that CMTM5-deficient mice  
297 do not display primary ultrastructural defects that affect the myelin sheath when highly  
298 abundant structural myelin proteins as PLP or CNP are lacking (**Table 1**). The comparison of  
299 our different mouse mutants has revealed that CMTM5 is required by mature oligodendrocytes.  
300 However, details of its mechanistic role in continued axon-glia interactions remain obscure.

301

302 CMTM5 is a member of the chemokine-like factor-like MARVEL-transmembrane containing  
303 (CMTM) protein family (Han et al., 2003) that has been associated with regulating tumor  
304 immunity (Burr et al., 2017; Mezzadra et al., 2017; Shao et al., 2007; Xiao et al., 2015; Yuan  
305 et al., 2020), including CMTM5 itself. Comparatively little is known about the functional  
306 relevance of CMTM proteins in the nervous system. However, we recently found the paralog  
307 CMTM6 to be expressed in myelinating Schwann cells, in which it is involved in the previously  
308 unknown function of Schwann cells to restrict the diameters of peripheral axons (Eichel et al.,  
309 2020). The consequences of deleting CMTM5 and CMTM6 in oligodendrocytes and Schwann  
310 cells, respectively, may appear roughly similar when considering that the myelin ultrastructure  
311 is not affected while axonal features are altered. Notably, however, deleting CMTM6 from  
312 Schwann cells causes increased diameters of peripheral axons but no signs of actual  
313 degeneration (Eichel et al., 2020) whereas deleting CMTM5 from oligodendrocytes causes  
314 CNS axonopathy without altering axonal calibers. Thus, CMTM5 and CMTM6 expressed by  
315 oligodendrocytes and Schwann cells have distinct functions in the CNS and the PNS,  
316 respectively.

317

318 The axonopathy observed upon deleting *Cmtm5* strongly implies that CMTM5 is involved in  
319 the oligodendroglial function of preserving axonal integrity and that this function is not limited  
320 to an early developmental stage. Oligodendroglial support of axons involves several  
321 mechanisms, including supplying energy-rich substrates via monocarboxylate transporters  
322 (Fünfschilling et al., 2012; Lee et al., 2012; Philips et al., 2021; Trevisiol et al., 2020), allocating  
323 antioxidative proteins and other enzymes via extracellular vesicles (Chamberlain et al., 2021;  
324 Frühbeis et al., 2020; Mukherjee et al., 2020), and modulating axonal transport (Edgar et al.,  
325 2004; Frühbeis et al., 2020), these mechanisms being possibly interrelated. It will be an  
326 important next step to identify the specific mechanism(s) of axonal support that are impaired  
327 when oligodendrocytes lack CMTM5.

328

329 It is helpful to compare the pathology of previously described myelin mutants with the axonal  
330 defects in CMTM5-deficient mice as assessed here. Notably, the presence of early-onset,  
331 progressive axonopathy is a shared feature of the myelin mutant mice lacking PLP (Edgar et  
332 al., 2004; Griffiths et al., 1998), CNP (Edgar et al., 2009; Lappe-Siefke et al., 2003) or CMTM5,  
333 which are normally myelinated (*Cmtm5*-mutants) or display only moderate hypomyelination  
334 (*Plp1* and *Cnp*-mutants). In contrast, entirely dysmyelinated *Mbp*-deficient *shiverer* mice  
335 (Roach et al., 1985) do not display axonal degeneration (Griffiths I et al., 1998; Ou et al., 2009;  
336 Uschkureit et al., 2000). This indicates that the lack of myelin *per se* is less detrimental for  
337 axons than axonal ensheathment with functionally impaired myelin. Moreover, APP-  
338 immunopositive axonal swellings, astrogliosis and microgliosis are early features when PLP  
339 (Griffiths et al., 1998; de Monasterio-Schrader et al., 2013; Edgar et al., 2004; Steyer et al.,  
340 2020; Trevisiol et al., 2020) or CNP (Edgar et al., 2009; Lappe-Siefke et al., 2003; Wieser et  
341 al., 2013) are lacking, but emerges at much older age in CMTM5-deficient mice. This indicates  
342 that the pathomechanisms differ between *Plp1* and *Cnp*-mutants and *Cmtm5*-mutants. This is  
343 supported by our observation that the axonopathy is ameliorated by the presence of the *Wld<sup>s</sup>*  
344 mutation in CMTM5-deficient mice, different from that in PLP- and CNP-deficient mice, at least  
345 at the examined time points and in presence of one copy of the *Wld<sup>s</sup>* gene (Edgar et al., 2004,  
346 2009). Together, this implies different dynamics, and probably different mechanisms of  
347 axonopathy when oligodendrocytes lack PLP, CNP or CMTM5.

348

349 The *Wlds* mutation can protect axons from various types of physical, toxic or genetic insult  
350 (Coleman et al., 1998; Coleman & Höke, 2020; Lunn et al., 1989). In the *Wld<sup>s</sup>* pathway, a key  
351 regulator of axonal degeneration is the enzyme sterile alpha and TIR motif containing protein  
352 1 (SARM1) (Gerdtts et al., 2013; Osterloh et al., 2012). Both, the *Wld<sup>s</sup>* mutation and deletion of  
353 the *Sarm1* gene can delay axonal degeneration (Coleman et al., 1998; Hopkins et al., 2021),

354 involving the maintenance of high NAD<sup>+</sup> levels along the axon (di Stefano et al., 2015; Gilley  
355 & Coleman, 2010; Hopkins et al., 2021; Wang et al., 2005). To the best of our knowledge,  
356 CMTM5-deficient mice represent the first model in which the axonopathy that emerges upon  
357 deletion of a CNS myelin protein is ameliorated by the *Wld<sup>S</sup>* mutation. Only the degeneration  
358 of axons in the PNS of mice lacking myelin protein zero (MPZ/P0) is robustly delayed by the  
359 presence of the *Wld<sup>S</sup>* mutation (Samsam et al., 2003). Thus, genetic defects of  
360 oligodendrocytes or Schwann cells can cause an axonopathy with a Wallerian-like  
361 pathomechanism in the CNS and PNS, respectively. It will be important to test if the currently  
362 developed small molecule SARM1 inhibitors (Bosanac et al., 2021; Hughes et al., 2021; Loring  
363 et al., 2020) allow counteracting axonal degeneration secondary to an insult primarily affecting  
364 oligodendrocytes.

365

366

## 367 **Material and Methods**

368

### 369 **Mouse models and mouse lines**

370 Frozen sperm of mice carrying the 'knockout-first' allele of the *Cmtm5* gene (C57BL/6N-A<sup>tm1Brd</sup>  
371 *Cmtm5*<sup>tm1a(KOMP)Wtsi/Wtsi</sup>) was acquired from The Mouse Genetics Project (Wellcome Trust  
372 Sanger Institute, Hinxton, UK). *Cmtm5*<sup>tm1a(KOMP)Wtsi</sup> mice were generated by the transgene  
373 facility of the Max Planck Institute of Experimental Medicine (Göttingen, Germany) by *in vitro*  
374 fertilization using standard procedures. The LacZ/neo cassette was deleted by crossbreeding  
375 these mice with *Gt(ROSA)26Sor*<sup>tm1(FLP1)Dym</sup> mice expressing flippase (Farley et al., 2000)  
376 yielding mice heterozygous for the floxed *Cmtm5* allele (*Cmtm5*<sup>tm1c(KOMP)Wtsi</sup> mice, also termed  
377 *Cmtm5*<sup>fl/+</sup>) which were bred to homozygosity. To delete *Cmtm5* in oligodendrocytes, *Cmtm5*<sup>fl/fl</sup>  
378 mice were crossbred with mice expressing *Cre* under the *Cnp* promoter (*Cnp*<sup>tm(cne puro)Kan</sup> mice,  
379 also termed *Cnp*<sup>Cre/WT</sup>; Lappe-Siefke et al., 2003) yielding *Cmtm5*<sup>fl/fl</sup>\**Cnp*<sup>Cre/WT</sup> mice (also  
380 termed *Cmtm5* cKO). In experiments assessing *Cmtm5* cKO mice, *Cmtm5*<sup>fl/fl</sup> mice served as  
381 controls. Taking advantage of germline-recombination we gained a mouse line with a body-  
382 wide deletion of *Cmtm5* (*Cmtm5*<sup>tm1d(KOMP)Wtsi</sup> mice, also termed *Cmtm5*<sup>-/-</sup> or Knock-out). In  
383 experiments assessing *Cmtm5*<sup>-/-</sup> mice, *Cmtm5*<sup>+/+</sup> mice served as controls. To delete *Cmtm5* in  
384 oligodendrocytes of adult mice, *Cmtm5*<sup>fl/fl</sup> were crossbred with mice expressing tamoxifen-  
385 inducible *Cre* under the *Plp* promoter (Tg(Plp1-cre/ERT2)1Ueli, *Plp*<sup>CreERT2</sup>, Leone et al., 2003)  
386 resulting in *Cmtm5*<sup>fl/fl</sup>\**Plp*<sup>CreERT2</sup> mice (also termed *Cmtm5* iKO) and respective controls without  
387 *Cre*. For induction, male mutant mice (*Cmtm5*<sup>fl/fl</sup>\**Plp*<sup>CreERT2</sup>) and male control mice (*Cmtm5*<sup>fl/fl</sup>)  
388 were injected with Tamoxifen intraperitoneally at 8 weeks of age for 10 days with a 2-day break  
389 after the first five injection days (1 mg tamoxifen dissolved in 100 µl corn oil per mouse and  
390 day). *Cmtm5*<sup>+/-</sup> mice were crossbred with *Cmtm5*<sup>+/-</sup> mice harboring the *WLD*<sup>S</sup> mutation (*Wld*<sup>S</sup>,  
391 Coleman et al., 1998; Mack et al., 2001) to obtain all experimental groups from the same  
392 breeding scheme (Control groups: *Cmtm5*<sup>+/+</sup> and *Cmtm5*<sup>+/+</sup>\**Wld*<sup>S</sup>; knock-out groups: *Cmtm5*<sup>-/-</sup>  
393 and *Cmtm5*<sup>-/-</sup>\**Wld*<sup>S</sup>). Littermate mice were used as experimental controls as far as possible.

394

395 Genotyping was carried out by genomic PCR. *Cmtm5* genotypes were assessed with the same  
396 PCR strategy in all *Cmtm5* lines (*Cmtm5* cKO, *Cmtm5*<sup>-/-</sup>, *Cmtm5* iKO, *Cmtm5*\**Wld*<sup>S</sup>). Sense  
397 primer (5'-AGTAGTGGCC CATTGCCATC) in combination with antisense primer (5'-  
398 TGGTTAGGGG GCTCCTCTTC) yielded a 626 bp product (floxed allele) or 437 bp product  
399 (wildtype). In the same reaction, antisense primer (5'-GAGCTCAGAC CATAACTTCG) was  
400 used to detect *Cmtm5* allele recombination yielding a 313 bp fragment. Detection of the *Cnp*<sup>Cre</sup>  
401 allele (Lappe-Siefke et al., 2003) was carried out using sense primer (5'-GCCTTCAAAC  
402 TGCCATCTC) and antisense primer (5'-CCCAGCCCTT TTATTACCAC) amplifying a 700 bp  
403 product. As well as a sense (5'-CAGGGTGTTA TAAGCAATCCC) and antisense (5'-

404 CCTGGAAAAT GCTTCTGTCCG) primer yielding a 357bp fragment when Cre positive.  
405 *Plp<sup>CreERT2</sup>* (Leone et al., 2003) was detected using sense primer (5`-TGGACAGCTG  
406 GGACAAAGTAAGC) and antisense primer (5`-CGTTGCATCG ACCGGTAATGCAGGC)  
407 yielding a 250 bp product. The *Wds* mutation (Coleman et al., 1998; Mack et al., 2001) was  
408 detected using sense primer (5`-CGTTGGCTCT AAGGACAGCAC) and antisense primer (5`-  
409 CTGCAGCCCC CACCCCTT) yielding a 182 bp product.

410  
411 Mice were bred and kept in the mouse facility of the Max Planck Institute of Experimental  
412 Medicine, Göttingen. Experimental mutant mice were analyzed with littermate controls as far  
413 as possible. All animal experiments were performed in accordance with the German animal  
414 protection law (TierSchG) and approved by the Niedersächsisches Landesamt für  
415 Verbraucherschutz und Lebensmittelsicherheit (LAVES) under license 33.19-42502-04-  
416 15/1833 and 33.8-42502-04-19/3172.

417

#### 418 **Biochemical purification of myelin from mouse brains**

419 Purification of a myelin-enriched light weight membrane fraction from nervous tissue using  
420 sucrose density centrifugation and osmotic shocks was previously described (Erwig, Patzig, et  
421 al., 2019). Mice were sacrificed by cervical dislocation. Protein concentrations of brain lysate  
422 and myelin fractions were determined using the DC Protein Assay Kit (Bio-Rad, Munich,  
423 Germany) following the manufacturer's instruction and measured using the Eon™ High  
424 Performance Microplate Spectrophotometer (BioTek, Vermont, USA).

425

#### 426 **Immunoblotting**

427 Immunoblotting was essentially performed as described (Schardt et al., 2009). Brain lysate  
428 and myelin fraction samples were diluted in 4x SDS sample buffer (Glycerol 40% [w/v], Tris/HCl  
429 pH 6.8 240mM, sodium dodecyl sulfate (SDS) 8% [w/v] Bromphenol blue 0.04% [w/v]; 5%  
430 Dithiothreitol (DTT) was added as a reducing agent. Before usage, samples were heated at  
431 40°C for 10 min. For protein separation by SDS-PAGE, the Mini-PROTEAN Handcast system  
432 (BioRad, Munich, Germany) was used with self-casted acrylamide gels (10-15%). 5-15 µg  
433 samples were loaded per well (depending on protein of interest) next to 5 µl pre-stained protein  
434 ladder (PageRuler™, ThermoFischer Scientific, Waltham, USA). Proteins were separated by  
435 constant current (200V) for 45-60 min using a BioRad power supply. Immunoblotting was  
436 carried out with a Novex® Semi-Dry Blotter (Invitrogen, Karlsruhe, Germany) and proteins  
437 were transferred to an activated (100% Ethanol, 1 min; followed by two washing steps with  
438 water) PVDF membrane (GE Healthcare, Buckinghamshire, UK; Cat# 10600023) at 20V for  
439 45 min. After blotting, membranes were blocked in 1xTBS containing 5% non-fat dry milk  
440 (Frema, Karlsruhe, Germany) and 0.05% Tween-20 for one hour at room temperature (RT).

441 Primary antibodies were diluted in 5 ml blocking buffer and incubated overnight at 4°C and  
442 horizontal rotation. Membranes were washed thrice with TBS-T for 5-10 min each and  
443 incubated for one hour with secondary HRP antibodies diluted in blocking buffer. Membranes  
444 were washed three times with TBS-T for 5-10 min. Detection was carried out using enhanced  
445 chemiluminescent detection (ECL) according to the manufacturer's instructions (Western  
446 Lightning® Plus-ECL or SUpersignal™ West Femto Maximum Sensitive Substrate; Thermo  
447 Fischer Scientific, St Leon-Rot, Germany). Immunoblots were scanned using ECL Chemostar  
448 (Intas Science Imaging, Göttingen, Germany). For antibody information see **Table 2**.

449

#### 450 **Label-free quantification of myelin proteins**

451 In-solution digestion of myelin proteins according to an automated filter-aided sample  
452 preparation (FASP) protocol (Patzig et al., 2016) and LC-MS-analysis by different MS<sup>E</sup>-type  
453 data-independent acquisition (DIA) mass spectrometry approaches was performed as recently  
454 established for PNS (Siems et al., 2020) and CNS (Jahn et al., 2020) myelin. Briefly, protein  
455 fractions corresponding to 10 µg myelin protein were dissolved in lysis buffer (1% ASB-14, 7  
456 M urea, 2 M thiourea, 10 mM DTT, 0.1 M Tris pH 8.5) and processed according to a CHAPS-  
457 based FASP protocol in centrifugal filter units (30 kDa MWCO, Merck Millipore). After removal  
458 of the detergents, protein alkylation with iodoacetamide, and buffer exchange to digestion  
459 buffer (50 mM ammonium bicarbonate (ABC), 10 % acetonitrile), proteins were digested  
460 overnight at 37°C with 400 ng trypsin. Tryptic peptides were recovered by centrifugation and  
461 extracted with 40 µl of 50 mM ABC and 40 µl of 1% trifluoroacetic acid (TFA), respectively.  
462 Combined flow-throughs were directly subjected to LC-MS-analysis. For quantification  
463 according to the TOP3 approach (Silva et al., 2006), aliquots were spiked with 10 fmol/µl of  
464 Hi3 EColi standard (Waters Corporation), containing a set of quantified synthetic peptides  
465 derived from E. coli. Chaperone protein ClpB.

466

467 Nanoscale reversed-phase UPLC separation of tryptic peptides was performed with a  
468 nanoAcquity UPLC system equipped with a Symmetry C18 5 µm, 180 µm × 20 mm trap column  
469 and a HSS T3 C18 1.8 µm, 75 µm × 250 mm analytical column (Waters Corporation)  
470 maintained at 45°C. Peptides were separated over 120 min at a flow rate of 300 nl/min with a  
471 gradient comprising two linear steps of 3-35% mobile phase B (acetonitrile containing 0.1%  
472 formic acid) in 105 min and 35-60% mobile phase B in 15 min, respectively. Mass  
473 spectrometric analysis on a quadrupole time-of-flight mass spectrometer with ion mobility  
474 option (Synapt G2-S, Waters Corporation) was performed in the dynamic range-enhanced  
475 (DRE)-UDMS<sup>E</sup> mode as established previously for proteome analysis of purified myelin (Jahn  
476 et al., 2020; Siems et al., 2020). Continuum LC-MS data were processed using Waters  
477 ProteinLynx Global Server (PLGS) and searched against a custom database compiled by



478 adding the sequence information for E. coli. Chaperone protein ClpB and porcine trypsin to the  
479 UniProtKB/Swiss-Prot mouse proteome (release 2017-07, 16909 entries) and by appending  
480 the reversed sequence of each entry to enable the determination of false discovery rate (FDR).  
481 Precursor and fragment ion mass tolerances were automatically determined by PLGS and  
482 were typically below 5 ppm for precursor ions and below 10 ppm (root mean square) for  
483 fragment ions. Carbamidomethylation of cysteine was specified as fixed and oxidation of  
484 methionine as variable modification. One missed trypsin cleavage was allowed. Minimal ion  
485 matching requirements were two fragments per peptide, five fragments per protein, and one  
486 peptide per protein. The FDR for protein identification was set to 1% threshold.

487  
488 For post-identification analysis including TOP3 quantification of proteins, ISOQuant (Distler et  
489 al., 2014; Kuharev et al., 2015) software freely available at [www.isoquant.net](http://www.isoquant.net)) was used as  
490 described previously (Jahn et al., 2020; Siems et al., 2020). Only proteins represented by at  
491 least two peptides (minimum length six amino acids, score  $\geq 5.5$ , identified in at least two runs)  
492 were quantified as parts per million (ppm), i.e. the relative amount (w/w) of each protein in  
493 respect to the sum over all detected proteins. FDR for both peptides and proteins was set to  
494 1% threshold and at least one unique peptide was required. Proteome profiling comparing  
495 myelin from *Cmtm5* cKO and CTRL mice was performed with three biological replicates and  
496 duplicate digestion, resulting in a total of 6 LC-MS runs per condition. The mass spectrometry  
497 proteomics data have been deposited to the ProteomeXchange Consortium via the PRIDE  
498 (Perez-Riverol et al., 2019) partner repository with dataset identifier **PXD029443**.

499

## 500 **Electron microscopy**

501 For transmission electron microscopy (TEM) optic nerves and spinal cords were dissected and  
502 fixed in Karlsson-Schulz fixative (4% PFA, 2.5% Glutaraldehyde in 0.1 M phosphate buffer)  
503 overnight. Samples were processed and embedded in epoxy resin (Serva, Heidelberg,  
504 Germany) as described (Möbius et al., 2010). For TEM, ultrathin (50 nm) sections were  
505 prepared using a PTPC Powertome Ultramicrotome (RMC, Tuscon Arizona, USA) and a  
506 diamond knife (Diatome AG, Biel, Switzerland). Sections were cut and collected on formwar  
507 coated copper grids (AGAR scientific, Essex, UK). To enhance contrast, ultrathin sections  
508 were stained with UranylLess (Electron Microscopy Science, Hatfield, Panama) for 20 min and  
509 washed 6 times with  $\text{d}_2\text{H}_2\text{O}$ . For analysis 16-20 non-overlapping random images were taken  
510 per animal using the Zeiss EM900 at 7000x (one image =  $220 \mu\text{m}^2$ ). All image analysis was  
511 performed using Fiji (Version 2.0.0-rc-68/1.52i; Schindelin et al., 2012).

512

513 To assess relative number of pathological axons (degenerated axons, axonal swellings) and  
514 pathological myelin (myelin outfoldings, double myelination, inner tongue swellings) units, all

515 axons on 16-20 non-overlapping random images were analyzed per mouse. For axon diameter  
516 analysis, all normal-appearing, accurately cross-sectioned myelinated axons were evaluated  
517 on 16-20 non-overlapping random images. Data is presented as mean axonal diameter per  
518 animal. g-ratios were calculated as ratio between axonal diameter and the outer diameter of  
519 the corresponding myelin sheath. In total 180-200 axons were randomly selected for g-ratio  
520 analysis from 16-20 EM images per mouse using the Fiji Grid tool (Circular grids, 3  $\mu\text{m}^2$  per  
521 point, random offset).

522

523 For the analysis of axon number, semithin sections (thickness 500 nm) were cut and stained  
524 with methylene blue/azur II (1:1) for one minute followed by a washing step with H<sub>2</sub>O. Images  
525 were acquired at 100x using a bright-field light microscope (Zeiss AxioImager Z1 coupled to a  
526 Zeiss Axio Cam MRc camera; controlled and stitched by Zeiss Zen 1.0 software). Using Fiji,  
527 optic nerve images were separated into 55  $\mu\text{m}^2$  rectangles. From all rectangles filled with ON  
528 tissue 5 were chosen at random and all axons were counted. Axon number is shown as mean  
529 of 5 assessed rectangles per mouse.

530

### 531 **Focused ion beam – scanning electron microscopy**

532 Samples were prepared according to (Steyer et al., 2020). In brief, dissected optic nerve  
533 samples were immersed in primary fixative (Karlsson-Schultz phosphate buffer: 109.5 mM  
534 NaH<sub>2</sub>PO<sub>4</sub>·H<sub>2</sub>O, 93.75 mM Na<sub>2</sub>HPO<sub>4</sub>·2H<sub>2</sub>O, 86.2 mM NaCl, 2.5% glutaraldehyde, 4%  
535 formaldehyde. Adjust the pH to 7.4 and filter, at 4 °C for at least 24 h) and processed with a  
536 modified OTO-protocol (osmium-thiocarbohydrazide-osmium) as previously described (Weil  
537 et al., 2018) based on a previously established original protocol (Deerinck et al., 2010). Briefly,  
538 samples were post-fixed for 3 h with 2% OsO<sub>4</sub> (EMS, Hatfield, USA) and 1.5% K<sub>3</sub>Fe(CN)<sub>6</sub>  
539 (EMS, Hatfield, USA) at 4°C followed by a contrasting step with 1% thiocarbohydrazide  
540 (Sigma-Aldrich, St. Louis, USA) for 1 h at room temperature and 1.5 h incubation with 2%  
541 OsO<sub>4</sub>. *En bloc* staining was performed with 2% uranyl acetate overnight at 4°C. The next day  
542 the samples were dehydrated through a series of ascending concentrations of acetone (EMS,  
543 Hatfield, USA) for 15 min each (30%, 50%, 75%, 90%, 3× 100%) and incubated with increasing  
544 concentrations of the epoxy resin Durcupan (Sigma-Aldrich, St. Louis, USA) (2:1, 1:1, 1:2) for  
545 2 h each and left over night in 90% Durcupan without component D. The next day the samples  
546 were incubated with 100% Durcupan (all components: A (epoxy resin) 11.4 g, B (hardener) 10  
547 g, C (accelerator) 0.3 g, D (plasticizer) 0.1 g) for 4.5 h and polymerized for 48 h at 60°C.

548

549 The polymerized samples were trimmed using a 90° trimming knife (Diatome AG, Biel,  
550 Switzerland) and positioned on a SEM-stub using silver conductive resin (EPO-TEK 129-4)  
551 (EMS, Hatfield, USA). The surface was sputter coated (Leica, ACE 600) (Leica, Wetzlar,

552 Germany) with a layer of 10 nm platinum and placed inside the FIB-SEM (Crossbeam 540,  
553 Zeiss, Oberkochen, Germany). After exposing a cross-section through the region of interest  
554 with 15 nA ion current and polishing with 7 nA, a 400 nm deposition of platinum was performed  
555 using 3 nA. The final dataset was acquired at 1.5 kV (1000 pA) 5 nm × 5 nm × 25 nm voxel  
556 size with a milling current of 1.5 nA. Fiji (Schindelin et al., 2012) was used for all following  
557 image processing steps: The images were aligned using the SIFT algorithm, cropped and  
558 inverted. They were smoothed using a Gaussian blur (sigma 1) and a local contrast  
559 enhancement was applied (CLAHE: blocksize 127, histogram bins 256, maximum slope 1.25).  
560 The dataset was binned by 2 in x and y. Analysis of pathological myelin and axon profiles was  
561 carried out using Fiji. All profiles in the volume belonging to one of the categories (myelin  
562 outfoldings, inner-tongue inclusions, axoplasmic inclusions, myelin whorls) were counted, and  
563 values were normalized to a volume of 10000  $\mu\text{m}^3$ . Example 3D models were reconstructed  
564 using IMOD (v 4.9.12, University of Colorado, <https://bio3d.colorado.edu/imod>).

565

### 566 **Immunohistochemistry**

567 Sections (5  $\mu\text{m}$ ) of paraffin-embedded brains were used to determine neuropathology and  
568 oligodendrocyte number. Section preparation was as previously described (de Monasterio-  
569 Schrader et al., 2012; Patzig et al., 2016). To assess neuropathology in *Cmtm5* cKO and  
570 control mice, 3-5 mice per genotype were analyzed for each timepoint (P30, P75, P365) and  
571 labelled for amyloid precursor protein (APP) (Chemicon, 1:1000), MAC3 (Pharmingen, 1:400),  
572 glial fibrillary acidic protein (GFAP) (Novo Castra, 1:200) or IBA1 (abcam, 1:1000). Images  
573 were acquired at 40x magnification using a bright-field light microscope (Zeiss AxioImager Z1,  
574 coupled to Zeiss AxioCam MRc Camera; controlled and stitched by Zeiss Zen 1.0 software).  
575 The hippocampal fimbria was analyzed by counting APP positive axonal swellings per selected  
576 area or by using an ImageJ plugin to semiautomatically determine the area of  
577 GFAP/MAC3/IBA1 immunopositivity as previously described (de Monasterio-Schrader et al.,  
578 2012; Lüders et al., 2017; Patzig et al., 2016). To assess oligodendrocyte number, sections of  
579 paraffin-embedded brains from *Cmtm5* cKO and control mice at P75 were deparaffinized and  
580 rehydrated as with sections for neuropathology. Sections were then blocked for 1 hour at room  
581 temperature with PBS containing BSA and horse serum. Incubation with primary antibody was  
582 then carried out over 48h at 4°C with anti-CAII antibody (1:300 in PBS containing 1% HS). Slides  
583 were washed thrice for 10 minutes with PBS and incubated with DAPI (Thermo Scientific,  
584 Waltham, USA) and anti-rabbit Alexa555 (Dianova, 1:1000 in PBS containing 1% HS). Slides  
585 were washed again thrice with PBS for 10 minutes and mounted using AquaPolymount. The  
586 hippocampal fimbria was imaged using the Axio Observer Z2 (Zeiss) at a 40x magnification  
587 and stitched using Zeiss Zen2011. All cells positive for both DAPI and CAII were identified as

588 oligodendrocytes. All positive cells were counted and normalized to an area of 1 mm<sup>2</sup>. For  
589 antibody information see **Table 2**.

590

### 591 **Preparation of cryosections and confocal imaging**

592 Cryosection were obtained from spinal cords immersion fixed with 4% PFA overnight. Nerves  
593 were then transferred to a sucrose buffer (10% [w/v], 20% [w/v], 30% [w/v] in 0.1 M phosphate  
594 buffer) over night at 4°C for each concentration. The nerves were then embedded in small  
595 plastic chambers using Tissue-Tek® O.C.T.<sup>TM</sup> Compound (Sakura, Staufen, Germany).  
596 Nerves were stored at -20°C until further use. 10 µm thick cross-sections were prepared using  
597 a cryostat (Reichert Jung® Cryocut 18000, Wetzlar, Germany) and transferred to Superfrost®  
598 Plus microscope slides (Thermo Fischer Scientific, St. Leon-Rot, Germany). Slides were dried  
599 for 30 minutes at room temperature and stored at -20°C until further use.

600

601 Sections were stained with the following protocol using 200 µl volumes per slide: 3 minutes  
602 Methanol, 30 minutes permeabilization using PBS with 0.4% [v/v] Triton-X100 (Sigma Aldrich,  
603 St. Louis, USA) followed by blocking using DAKO blocking buffer (DAKO, Hamburg, Germany)  
604 for 60 minutes. TUJ1 (Covance) and CMTM5 (custom made by Pineda, Berlin, Germany Table  
605 2) antibodies were diluted in antibody diluent (DAKO, Hamburg, Germany) and incubated for  
606 48 hours at 4°C in a dark, humid chamber. Sections were then washed three times with PBS  
607 for 10 minutes and incubated with secondary antibodies (α-rabbit STAR-RED, α-mouse STAR-  
608 ORANGE, abberior, Göttingen, Germany, Table 2) diluted 1:200 in antibody diluent for 60  
609 minutes. Sections were washed 3 times with PBS for 10 minutes and mounted using  
610 AquaPolymount (Polysciences, Warrington, USA). Images were obtained on a Confocal and  
611 STED FACILITY line microscope (Abberior Instruments, Germany) and acquired as xy-plane  
612 with a pixel size of 30nm. The fluorophores were excited with appropriate excitation lasers at  
613 640nm (abberior STAR RED) and 561nm (abberior STAR ORANGE). For image acquisition  
614 the microscope software “Lightbox” as provided by Abberior Instruments was used.

615

### 616 **Magnetic Resonance Imaging and Spectroscopy**

617 Magnetic resonance imaging (MRI) and spectroscopy (MRS) were acquired on a 9.4T Bruker  
618 BioSpec MR system with a 30 cm horizontal bore and B-GA12 gradient system operating on  
619 Bruker ParaVision 6.0.1 (Hardware and software from Bruker BioSpin MRI GmbH, Ettlingen,  
620 Germany). A four-channel (2×2) receive-only mouse head coil was used, in combination with  
621 a 112/84 resonator, to acquire MRI and MRS (both from Bruker BioSpin MRI GmbH, Ettlingen).

622

623 The MRI protocol included magnetization transfer (MT)-weighted images and diffusion-  
624 weighted images. For MT, a 3D fast low angle shot (FLASH) sequence was used to acquire

625 three datasets: MT-weighted, proton density-weighted, and T1-weighted (repetition time [15.1,  
626 15.1, 18] ms, echo time 3.4 ms, flip angles [5°, 5°, 25°], two averages, voxel size 100 µm × 100  
627 µm × 100 µm, acquisition time 18.4 min). These datasets were used to estimate MT saturation  
628 (MTsat) according to the method described by (Helms et al., 2008). Diffusion-weighted images  
629 (DWI) were acquired using a spin-echo echo-planar imaging sequence (repetition time 2000  
630 ms, echo time 21.5 ms, two repetitions, voxel size 100 µm × 100 µm × 500 µm, gradient  
631 duration and separation 2.5 ms and 12.5 ms, b values 0, 1000 and 2000, gradient directions  
632 30 for each b value, acquisition time 17.2 min). These DWI were preprocessed through  
633 denoising (Fadnavis et al., 2020) and averaged across repetitions. A diffusion tensor model  
634 (Basser et al., 1994) was fitted to the preprocessed DWI data, and fractional anisotropy (FA),  
635 axial diffusivity (AD), radial diffusivity (RD), and mean diffusivity (MD) maps were derived  
636 (Garyfallidis et al., 2014). Multi-echo gradient-recalled echo (GRE) images were acquired  
637 using a 3D GRE sequence (repetition time 25 ms, echo time 2.2 ms, echo spacing 2 ms,  
638 number of echoes 10, flip angle 12°, four averages, voxel size 70 µm × 70 µm × 300 µm,  
639 acquisition time 19 min). The effective transverse relaxation rate ( $R_2^*$ ) maps were calculated  
640 using by fitting the multi-echo GRE magnitude signal decay across all echo times with a mono-  
641 exponential model (Pei et al., 2015).

642  
643 MRS was acquired from cortices and corpus callosi using a stimulated echo acquisition mode  
644 (STEAM) sequence. The parameters of the STEAM sequence were: repetition time of 6000  
645 ms, echo time of 10 ms, spectral width of 5000 Hz, 2048 data points, 128 averages, and a total  
646 acquisition time of 12:48 min. The dimensions of the cortical and corpus callosal voxels were  
647 3.9×0.7×3.2 mm<sup>3</sup> and 3.9×0.7×1.7 mm<sup>3</sup>, respectively. All spectra were acquired with CHES  
648 water suppression and outer volume suppression. The spectra were analyzed and quantified  
649 using LCModel (Provencher, 1993) in the chemical shift range from 0.2 to 4.2 ppm. Values  
650 with Cramer-Rao lower bounds above 20% were excluded from further analyses. Statistics  
651 were performed in *Excel* using a 2-tailed, unpaired Student's t-test assuming equal variance.

652  
653 **Electroretinography (ERG) and visually evoked potentials (VEP)**  
654 ERGs were recorded as described (Dieck et al., 2012) and VEP were recorded essentially as  
655 described (Ridder & Nusinowitz, 2006). Briefly, mice were dark adapted overnight and  
656 anesthetized with Ketamin (125µg/g), Xylazin (2,5µg/g) and Buprenorphin i.p. (0,1 mg/kg).  
657 Eyes were kept moist using contact lens solution containing hyaluronic acid for ERG recordings  
658 and with Methocel (DuPont Pharma, Mississauga, Canada) for VEP recordings. For ERG  
659 recordings, a silver ball electrode placed in the outer angle of the left eye served as active  
660 electrode. Signals were averaged 10 times. For VEP recordings, the scalp was resected and  
661 a small hole was drilled on the right side 1 mm lateral and 1mm rostral of lambda and a thin



662 needle electrode was inserted superficially. Signals were averaged at least 50 times. The  
663 reference electrode was placed on the nose of the mouse and the common ground near the  
664 hind legs. Signals were amplified 1000 times (NeuroAmp) and sampled without analog filtering.  
665 0.1 ms light flashes were generated using BioSig Software and TDT system III hardware  
666 (Tucker Davis Technologies, Davis, USA) and presented via a custom-designed Ganzfeld  
667 apparatus at a stimulus rate of 0.5 Hz. Illumination was calibrated using a luxmeter (Mavolux  
668 5032c, Nürnberg, Germany) and an Integrated Photodiode Amplifier 10530 (Integrated  
669 Photomatrix Limited, Dorchester, UK). Analysis was performed using custom written matlab  
670 scripts (version 2019b). For analysis of ERG and VEP thresholds, Student's t-test was applied.  
671 Data from ERG and VEP analysis (**Figure 5**) is represented in line graphs showing mean  
672 values of mice per genotype  $\pm$ SEM. To determine the genotype-dependent effect on ERG and  
673 VEP amplitude and latencies across various light intensities, 2-way-ANOVA was applied.

674

#### 675 **Retina preparation and assessment of retinal ganglion cell number**

676 To assess retinal ganglion cell numbers (RGC), eyes of 1 year old *Cmtm5*<sup>-/-</sup> mice and  
677 respective controls were dissected and fixed for one hour with 4% PFA/Phosphate Buffer (PB).  
678 Eyes were then rinsed in PB and retinae were dissected as follows. The eye was cut open  
679 along the ciliary body and cornea and lens were removed. The retinal pigment epithelium  
680 (RPG) was carefully removed. Four cuts on opposing sites were made to flatten the retina. The  
681 retina was transferred into a 24 well plate with 1 retina per well containing PBS. Retinae were  
682 washed with PBS/2% Triton X-100 (500  $\mu$ l/well) at room temperature and gentle agitation for  
683 10 minutes. To permeate nuclear membranes the wash solution was replaced by fresh  
684 PBS/2% Triton X-100 and retinae were frozen at -80°C for 10 minutes. Retinae were washed  
685 twice with PBS/0.5% Triton X-100 for 5 minutes at room temperature. To reduce unspecific AB  
686 binding retinae were incubated with blocking buffer (PBS/ 5%BSA/ 5% Donkey Serum/ 2%  
687 Triton X-100) for 1 hour at room temperature with gently agitation. To label RGCs, retinae were  
688 incubated with guinea pig anti-RBPMS (Sigma-Aldrich, St. Louis, USA); 1:200 in blocking  
689 buffer, 350  $\mu$ l per well) for 2 hours at room temperature. Retinae were then washed thrice with  
690 PBS/0.5% Triton X-100 for 10 minutes at RT. RGCs were labelled using donkey anti-guinea  
691 pig Alexa 555 (1:1000 in blocking buffer) and incubated over night at 4°C. Retinae were then  
692 washed thrice for 30 minutes with PBS and transferred to a superfrost slide with a fine brush.  
693 Retinae were mounted using AquaPolymount with the RGC layer facing up. Slides were kept  
694 at 4°C and dark until imaging. Images were taken using the Axio Observer Z2 (Zeiss) and a  
695 40x magnification and stitched using Zeiss Zen2011. For assessment of RGC number the  
696 average of 3 different areas (area= mm<sup>2</sup> per rectangle) were analyzed for each part of the  
697 retina (inner/middle/outer). Retinae of three individual mice per genotype were analyzed.

698



## 699 **Statistics**

700 All experiments were analyzed blinded to genotypes. Statistical assessment was performed  
701 using GraphPad Prism 8 (GraphPad Software Inc., San Diego, United States) unless noted  
702 otherwise. Two-sided Student's t-test was used to compare two groups unless specified  
703 otherwise. Welch's correction was performed in case of unequal distribution. Levels of  
704 significance were set as  $p < 0.05$  (\*),  $p < 0.01$  (\*\*) and  $p < 0.001$  (\*\*\*). Exact p-values are given in  
705 the figure legends, except those for the MRI data in **Figure 2 Supplement 1** are listed below.  
706 For all experiments, statistical test used and correction are given in the figure legend. Data in  
707 **Figure 1 Supplement 1; Figure 2 D-E, I-J, N; Figure 3 B, C, E; Figure 3 Supplement 1;**  
708 **Figure 3 Supplement 2; Figure 3 Supplement 3, Figure 4 A`-D`;** **Figure 6 C, F; Figure 7**  
709 **C, E;** are given as bar graphs with mean  $\pm$ SEM; data points represent individual mice. Data  
710 from MRI analysis (**Figure 2 Supplement 1**) and ERG and VEP thresholds (**Figure 5 B, F**)  
711 are presented as boxplots; data points represent individual mice. Data for frequency  
712 distribution of axonal diameters (**Figure 3-Supplement 1 A`-C`**) are presented as bar graphs  
713 showing binned axonal diameters pooled of all mice per condition. Proteome data (**Figure 2**  
714 **B,B`**) is presented as volcano plot and heat map. Data correspond to 3 mice per genotype and  
715 2 technical replicate per mouse. The Bioconductor R packages 'limma' and 'q-value' were used  
716 to detect significant changes in protein abundance by moderated t-statistics as described  
717 (Ambrozkiewicz et al., 2018; Siems et al., 2020). Further information is provided in **Figure 2B**  
718 **source data 1**. g-ratios (**Figure 2 G, L**) are presented as scatter plots. Each data point  
719 represents an individual axon. In total, 200 axons were analyzed per mouse and 5 mice were  
720 analyzed per genotype. Data from ERG and VEP analysis (**Figure 5**) is represented in line  
721 graphs showing mean values of mice per genotype  $\pm$ SEM. To determine the genotype-  
722 dependent effect on ERG and VEP amplitude and latencies across light intensities, 2-way-  
723 ANOVA was applied.

724  
725 Exact sample size and number of mice are given in the figures or in the figure legends, except  
726 for the significance levels for MRI data in **Figure 2 supplement 1** which were as follows. CC,  
727 Corpus callosum; Fim, Fimbria; Thal, Thalamus; Cort, Cortex; AC, Anterior commissure. Two-  
728 sided Student's t-test was applied. **(B)** CC:  $p = 0.1739$ ; Fim:  $p = 0.2244$ ; Thal:  $p = 0.3229$ ; Cort:  
729  $p = 0.6159$ ; AC:  $p = 0.3290$ . **(C)** CC:  $p = 0.7263$ ; Fim:  $p = 0.2223$ ; Thal:  $p = 0.9943$ ; Cort:  $p =$   
730  $0.5009$ ; AC:  $p = 0.2425$ . **(D)** CC:  $p = 0.7103$ ; Fim:  $p = 0.2608$ ; Thal:  $p = 0.6903$ ; Cort:  $p = 0.3576$ ;  
731 AC:  $p = 0.2531$ . **(E)** CC:  $p = 0.4374$ ; Fim:  $p = 0.2038$ ; Thal:  $p = 0.8343$ ; Cort:  $p = 0.5728$ ; AC:  $p =$   
732  $0.2678$ . **(F)** CC:  $p = 0.7065$ ; Fim:  $p = 0.8432$ ; Thal:  $p = 0.7319$ ; Cort:  $p = 0.8614$ ; AC:  $p = 0.9983$ .  
733

734 **Data availability statement**

735 The mass spectrometry proteomics data have been deposited to the ProteomeXchange  
736 Consortium via the PRIDE partner repository with dataset identifier **PXD029443**.

737

738 **Ethics Statement**

739 All animal experiments were performed in accordance with the German animal protection law  
740 (TierSchG). Ethical review of animal experiments was performed by the Niedersächsisches  
741 Landesamt für Verbraucherschutz und Lebensmittelsicherheit (LAVES) and approved with  
742 licenses 33.19-42502-04-15/1833 and 33.8-42502-04-19/3172.

743

744 **Competing interest statement**

745 MM is affiliated with Abberior Instruments GmbH; the author has no financial interests to  
746 declare. KAN is a Reviewing Editor for eLIFE. All other authors declare no competing interest.

747

748 **Funding**

749 Deutsche Forschungsgemeinschaft (DFG) WE 2720/2-2 to HBW

750 Deutsche Forschungsgemeinschaft (DFG) WE 2720/4-1 to HBW

751 Deutsche Forschungsgemeinschaft (DFG) WE 2720/5-1 to HBW

752 European Research Council (ERC) Advanced Grant MyelinNano to KAN

753 The funders had no role in study design, data collection and interpretation, or the decision to  
754 submit the work for publication.

755

756 **Acknowledgments**

757 We thank S. Bode, K. Kötz, A. Fahrenholz, K. Fuhrmann, D. Hesse, R. Jung, U. Kutzke and  
758 S. Thom for technical assistance, G. Hoch for hardware development and technical support,  
759 U. Fünfschilling for *in vitro* fertilization, J. Groh for providing protocols, S. Ghandour and K.  
760 Kusch for antibodies, and J. Edgar for discussions. We thank the Wellcome Trust Sanger  
761 Institute Mouse Genetics Project (Sanger MGP) and its funders for providing the mutant mouse  
762 line *Cmtm5<sup>tm1a(KOMP)Wtsi</sup>*.

763

764 **Authors ORCIDs**

765 Tobias J Buscham <http://orcid.org/0000-0002-6916-3102>

766 Maria A Eichel-Vogel <http://orcid.org/0000-0002-9925-7249>

767 Anna M. Steyer <http://orcid.org/0000-0002-4814-7517>

768 Olaf Jahn <http://orcid.org/0000-0002-3397-8924>

769 Nicola Strenzke <http://orcid.org/0000-0003-1673-1046>

770 Rakshit Dadarwal <http://orcid.org/0000-0003-3091-2580>

771 Tor R Memhave <http://orcid.org/0000-0002-3448-1581>

772 Sophie B. Siems <http://orcid.org/0000-0002-7760-2507>

773 Ting Sun <http://orcid.org/0000-0002-7104-7215>

774 Torben Ruhwedel <http://orcid.org/0000-0002-9535-9395>

775 Wiebke Möbius <http://orcid.org/0000-0002-2902-7165>

776 Eva-Maria Krämer Albers <http://orcid.org/0000-0001-7994-1185>

777 Susann Boretius <http://orcid.org/0000-0003-2792-7423>

778 Klaus-Armin Nave <http://orcid.org/0000-0001-8724-9666>

779 Hauke B Werner <http://orcid.org/0000-0002-7710-5738>

780

781

## 782 References

- 783 Ambrozkiwicz, M. C., Schwark, M., Kishimoto-Suga, M., Borisova, E., Hori, K., Salazar-  
784 Lázaro, A., Rusanova, A., Altas, B., Piepkorn, L., Bessa, P., Schaub, T., Zhang, X.,  
785 Rabe, T., Ripamonti, S., Rosário, M., Akiyama, H., Jahn, O., Kobayashi, T., Hoshino,  
786 M., ... Kawabe, H. (2018). Polarity Acquisition in Cortical Neurons Is Driven by  
787 Synergistic Action of Sox9-Regulated Wwp1 and Wwp2 E3 Ubiquitin Ligases and  
788 Intronic miR-140. *Neuron*, *100*(5), 1097-1115.e15.  
789 <https://doi.org/10.1016/j.neuron.2018.10.008>
- 790 Basser, P. J., Mattiello, J., & LeBihan, D. (1994). MR Diffusion Tensor Spectroscopy and  
791 Imaging. *Biophysical Journal*, *66*, 259–267.
- 792 Bosanac, T., Hughes, R. O., Engber, T., Devraj, R., Brearley, A., Danker, K., Young, K.,  
793 Kopatz, J., Hermann, M., Berthemy, A., Boyce, S., Bentley, J., & Krauss, R. (2021).  
794 Pharmacological SARM1 inhibition protects axon structure and function in paclitaxel-  
795 induced peripheral neuropathy. *Brain*. <https://doi.org/10.1093/brain/awab184/6272578>
- 796 Burr, M. L., Sparbier, C. E., Chan, Y. C., Williamson, J. C., Woods, K., Beavis, P. A., Lam, E.  
797 Y. N., Henderson, M. A., Bell, C. C., Stolzenburg, S., Gilan, O., Bloor, S., Noori, T.,  
798 Morgens, D. W., Bassik, M. C., Neeson, P. J., Behren, A., Darcy, P. K., Dawson, S. J.,  
799 ... Dawson, M. A. (2017). CMTM6 maintains the expression of PD-L1 and regulates  
800 anti-Tumour immunity. *Nature*, *549*(7670), 101–105.  
801 <https://doi.org/10.1038/nature23643>
- 802 Chamberlain, K. A., Huang, N., Xie, Y., LiCausi, F., Li, S., Li, Y., & Sheng, Z.-H. (2021).  
803 Oligodendrocytes enhance axonal energy metabolism by deacetylation of mitochondrial  
804 proteins through transcellular delivery of SIRT2. *Neuron*, *109*(21), 3456–3472.  
805 <https://doi.org/10.1016/j.neuron.2021.08.011>
- 806 Cohen, C. C. H., Popovic, M. A., Klooster, J., Weil, M. T., Möbius, W., Nave, K. A., & Kole,  
807 M. H. P. (2020). Saltatory Conduction along Myelinated Axons Involves a Periaxonal  
808 Nanocircuit. *Cell*, *180*(2), 311–322. <https://doi.org/10.1016/j.cell.2019.11.039>
- 809 Coleman, M. P., Conforti, L., Anne Buckmaster, E., Tarlton, A., Ewing, R. M., Brown, M. C.,  
810 Lyon, M. F., & Perry, V. H. (1998). An 85-kb tandem triplication in the slow Wallerian  
811 degeneration (Wlds) mouse. *Proceedings of the National Academy of Sciences*, *95*,  
812 9985–9990. <https://doi.org/10.1073/pnas.95.17.9985>
- 813 Coleman, M. P., & Höke, A. (2020). Programmed axon degeneration: from mouse to  
814 mechanism to medicine. *Nature Reviews Neuroscience*, *21*(4), 183–196.  
815 <https://doi.org/10.1038/s41583-020-0269-3>
- 816 de Monasterio-Schrader, P., Jahn, O., Tenzer, S., Wichert, S. P., Patzig, J., & Werner, H. B.  
817 (2012). Systematic approaches to central nervous system myelin. *Cellular and*  
818 *Molecular Life Sciences*, *69*(17), 2879–2894. [https://doi.org/10.1007/s00018-012-0958-](https://doi.org/10.1007/s00018-012-0958-9)  
819 [9](https://doi.org/10.1007/s00018-012-0958-9)
- 820 de Monasterio-Schrader, P., Patzig, J., Möbius, W., Barrette, B., Wagner, T. L., Kusch, K.,  
821 Edgar, J. M., Brophy, P. J., & Werner, H. B. (2013). Uncoupling of neuroinflammation  
822 from axonal degeneration in mice lacking the myelin protein tetraspanin-2. *GLIA*, *61*,  
823 1832–1847. <https://doi.org/10.1002/glia.22561>

- 824 Deerinck, T. J., Bushong, E. A., Thor, A., & Ellisman, M. H. (2010). Ncmir methods for 3D  
825 EM: A New protocol for preparation of biological specimens for serial block face  
826 scanning electron microscopy. *Microscopy*, 6–8.  
827 [http://scholar.google.com/scholar?start=320&q=Mark+Ellisman&hl=en&as\\_sdt=0,5#0](http://scholar.google.com/scholar?start=320&q=Mark+Ellisman&hl=en&as_sdt=0,5#0)
- 828 di Stefano, M., Nascimento-Ferreira, I., Orsomando, G., Mori, V., Gilley, J., Brown, R.,  
829 Janeckova, L., Vargas, M. E., Worrell, L. A., Loreto, A., Tickle, J., Patrick, J., Webster,  
830 J. R. M., Marangoni, M., Carpi, F. M., Pucciarelli, S., Rossi, F., Meng, W., Sagasti, A.,  
831 ... Conforti, L. (2015). A rise in NAD precursor nicotinamide mononucleotide (NMN)  
832 after injury promotes axon degeneration. *Cell Death and Differentiation*, 22(5), 731–742.  
833 <https://doi.org/10.1038/cdd.2014.164>
- 834 Dieck, S. T., Specht, D., Strenzke, N., Hida, Y., Krishnamoorthy, V., Schmidt, K. F., Inoue,  
835 E., Ishizaki, H., Tanaka-Okamoto, M., Miyoshi, J., Hagiwara, A., Brandstatter, J. H.,  
836 Löwel, S., Gollisch, T., Ohtsuka, T., & Moser, T. (2012). Deletion of the presynaptic  
837 scaffold cast reduces active zone size in rod photoreceptors and impairs visual  
838 processing. *Journal of Neuroscience*, 32(35), 12192–12203.  
839 <https://doi.org/10.1523/JNEUROSCI.0752-12.2012>
- 840 Distler, U., Kuharev, J., Navarro, P., Levin, Y., Schild, H., & Tenzer, S. (2014). Drift time-  
841 specific collision energies enable deep-coverage data-independent acquisition  
842 proteomics. *Nature Methods*, 11(2), 167–170. <https://doi.org/10.1038/nmeth.2767>
- 843 Edgar, J. M., McLaughlin, M., Werner, H. B., McCulloch, M. C., Barrie, J. A., Brown, A.,  
844 Faichney, A. B., Snaidero, N., Nave, K. A., & Griffiths, I. R. (2009). Early ultrastructural  
845 defects of axons and axon-glia junctions in mice lacking expression of Cnp1. *GLIA*,  
846 57(16), 1815–1824. <https://doi.org/10.1002/glia.20893>
- 847 Edgar, J. M., McLaughlin, M., Yool, D., Zhang, S. C., Fowler, J. H., Montague, P., Barrie, J.  
848 A., McCulloch, M. C., Duncan, I. D., Garbern, J., Nave, K. A., & Griffiths, I. R. (2004).  
849 Oligodendroglial modulation of fast axonal transport in a mouse model of hereditary  
850 spastic paraplegia. *Journal of Cell Biology*, 166(1), 121–131.  
851 <https://doi.org/10.1083/jcb.200312012>
- 852 Eichel, M. A., Gargareta, V. I., D'Este, E., Fledrich, R., Kungl, T., Buscham, T. J., Lüders, K.  
853 A., Miracle, C., Jung, R. B., Distler, U., Kusch, K., Möbius, W., Hülsmann, S., Tenzer,  
854 S., Nave, K. A., & Werner, H. B. (2020). CMTM6 expressed on the adaxonal Schwann  
855 cell surface restricts axonal diameters in peripheral nerves. *Nature Communications*,  
856 11(1), 4514. <https://doi.org/10.1038/s41467-020-18172-7>
- 857 Erwig, M. S., Hesse, D., Jung, R. B., Uecker, M., Kusch, K., Tenzer, S., Jahn, O., & Werner,  
858 H. B. (2019). Myelin: Methods for purification and proteome analysis. *Methods in*  
859 *Molecular Biology*, 1936, 37–63. [https://doi.org/10.1007/978-1-4939-9072-6\\_3](https://doi.org/10.1007/978-1-4939-9072-6_3)
- 860 Erwig, M. S., Patzig, J., Steyer, A. M., Dibaj, P., Heilmann, M., Heilmann, I., Jung, R. B.,  
861 Kusch, K., Möbius, W., Jahn, O., Nave, K.-A., & Werner, H. B. (2019). Anillin facilitates  
862 septin assembly to prevent pathological outfoldings of central nervous system myelin.  
863 *ELife*, 8, e43888. <https://doi.org/10.7554/eLife.43888.001>
- 864 Fadnavis, S., Batson, J., & Garyfallidis, E. (2020). *Patch2Self: Denoising Diffusion MRI with*  
865 *Self-Supervised Learning*. <http://arxiv.org/abs/2011.01355>

- 866 Farley, F. W., Soriano, P., Steffen, L. S., & Dymecki, S. M. (2000). Widespread  
867 Recombinase Expression Using FLPeR (Flipper) Mice. *Genesis*, 28, 106–110.
- 868 Franklin, R. J. M., Ffrench-Constant, C., Edgar, J. M., & Smith, K. J. (2012). Neuroprotection  
869 and repair in multiple sclerosis. *Nature Reviews Neurology*, 8(11), 624–634.  
870 <https://doi.org/10.1038/nrneurol.2012.200>
- 871 Frühbeis, C., Kuo-Elsner, W. P., Müller, C., Barth, K., Peris, L., Tenzer, S., Möbius, W.,  
872 Werner, H. B., Nave, K. A., Fröhlich, D., & Krämer-Albers, E. M. (2020).  
873 Oligodendrocytes support axonal transport and maintenance via exosome secretion.  
874 *PLoS Biology*, 18, e3000621. <https://doi.org/10.1371/journal.pbio.3000621>
- 875 Fünfschilling, U., Supplie, L. M., Mahad, D., Boretius, S., Saab, A. S., Edgar, J., Brinkmann,  
876 B. G., Kassmann, C. M., Tzvetanova, I. D., Möbius, W., Diaz, F., Meijer, D., Suter, U.,  
877 Hamprecht, B., Sereda, M. W., Moraes, C. T., Frahm, J., Goebbels, S., & Nave, K. A.  
878 (2012). Glycolytic oligodendrocytes maintain myelin and long-term axonal integrity.  
879 *Nature*, 485(7399), 517–521. <https://doi.org/10.1038/nature11007>
- 880 Garyfallidis, E., Brett, M., Amirbekian, B., Rokem, A., van der Walt, S., Descoteaux, M., &  
881 Nimmo-Smith, I. (2014). Dipy, a library for the analysis of diffusion MRI data. *Frontiers in*  
882 *Neuroinformatics*, 8(18). <https://doi.org/10.3389/fninf.2014.00008>
- 883 Gerdts, J., Summers, D. W., Sasaki, Y., DiAntonio, A., & Milbrandt, J. (2013). Sarm1-  
884 mediated axon degeneration requires both SAM and TIR interactions. *Journal of*  
885 *Neuroscience*, 33(33), 13569–13580. [https://doi.org/10.1523/JNEUROSCI.1197-](https://doi.org/10.1523/JNEUROSCI.1197-13.2013)  
886 13.2013
- 887 Ghandour, M. S., Vincendon, G., Gombos, A., Limozin, N., Filippi, D., Dalmaso, C., &  
888 Laurent, G. (1980). Carbonic Anhydrase and Oligodendroglia in Developing Rat  
889 Cerebellum: A Biochemical and Immunohistological Study. *Developmental Biology*, 77,  
890 73–83.
- 891 Gilley, J., & Coleman, M. P. (2010). Endogenous Nmnat2 Is an Essential Survival Factor for  
892 Maintenance of Healthy Axons. *PLoS Biology*, 8(1), e1000300.  
893 <https://doi.org/10.1371/journal.pbio.1000300>
- 894 Gong, S., Doughty, M., Harbaugh, C. R., Cummins, A., Hatten, M. E., Heintz, N., & Gerfen,  
895 C. R. (2007). Targeting Cre recombinase to specific neuron populations with bacterial  
896 artificial chromosome constructs. *Journal of Neuroscience*, 27(37), 9817–9823.  
897 <https://doi.org/10.1523/JNEUROSCI.2707-07.2007>
- 898 Griffiths I, Klugmann M, Anderson T, Thomson C, Vouyiouklis D, & Nave KA. (1998). Axonal  
899 swellings and degeneration in mice lacking the major proteolipid of myelin. *Science*,  
900 280, 1610–1613.
- 901 Hagemeyer, N., Goebbels, S., Papiol, S., Kästner, A., Hofer, S., Begemann, M., Gerwig, U.  
902 C., Boretius, S., Wieser, G. L., Ronnenberg, A., Gurvich, A., Heckers, S. H., Frahm, J.,  
903 Nave, K. A., & Ehrenreich, H. (2012). A myelin gene causative of a catatonia-depression  
904 syndrome upon aging. *EMBO Molecular Medicine*, 4(6), 528–539.  
905 <https://doi.org/10.1002/emmm.201200230>
- 906 Han, W., Ding, P., Xu, M., Wang, L., Rui, M., Shi, S., Liu, Y., Zheng, Y., Chen, Y., Yang, T.,  
907 & Ma, D. (2003). Identification of eight genes encoding chemokine-like factor



- 908 superfamily members 1-8 (CKLF5F1-8) by in silico cloning and experimental validation.  
909 *Genomics*, 81(6), 609–617. [https://doi.org/10.1016/S0888-7543\(03\)00095-8](https://doi.org/10.1016/S0888-7543(03)00095-8)
- 910 Hartline, D. K., & Colman, D. R. (2007). Rapid Conduction and the Evolution of Giant Axons  
911 and Myelinated Fibers. *Current Biology*, 17(1), 29–35.  
912 <https://doi.org/10.1016/j.cub.2006.11.042>
- 913 Helms, G., Dathe, H., Kallenberg, K., & Dechent, P. (2008). High-resolution maps of  
914 magnetization transfer with inherent correction for RF inhomogeneity and T1 relaxation  
915 obtained from 3D FLASH MRI. *Magnetic Resonance in Medicine*, 60(6), 1396–1407.  
916 <https://doi.org/10.1002/mrm.21732>
- 917 Hopkins, E. L., Gu, W., Kobe, B., & Coleman, M. P. (2021). A Novel NAD Signaling  
918 Mechanism in Axon Degeneration and its Relationship to Innate Immunity. *Frontiers in*  
919 *Molecular Biosciences*, 8, 703532. <https://doi.org/10.3389/fmolb.2021.703532>
- 920 Hughes, R. O., Bosanac, T., Mao, X., Engber, T. M., DiAntonio, A., Milbrandt, J., Devraj, R.,  
921 & Krauss, R. (2021). Small Molecule SARM1 Inhibitors Recapitulate the SARM1–/  
922 Phenotype and Allow Recovery of a Metastable Pool of Axons Fated to Degenerate.  
923 *Cell Reports*, 34(1), 108588. <https://doi.org/10.1016/j.celrep.2020.108588>
- 924 Ishii, A., Dutta, R., Wark, G. M., Hwang, S.-I., Han, D. K., Trapp, B. D., Pfeiffer, S. E., &  
925 Bansal, R. (2009). Human myelin proteome and comparative analysis with mouse  
926 myelin. *PNAS*, 106(34), 14605–14610. [www.pnas.org/cgi/content/full/](http://www.pnas.org/cgi/content/full/)
- 927 Jahn, O., Siems, S. B., Kusch, K., Hesse, D., Jung, R. B., Liepold, T., Uecker, M., Sun, T., &  
928 Werner, H. B. (2020). The CNS Myelin Proteome: Deep Profile and Persistence After  
929 Post-mortem Delay. *Frontiers in Cellular Neuroscience*, 14, 239.  
930 <https://doi.org/10.3389/fncel.2020.00239>
- 931 Jäkel, S., Agirre, E., Mendanha Falcão, A., van Bruggen, D., Lee, K. W., Knuesel, I.,  
932 Malhotra, D., French-Constant, C., Williams, A., & Castelo-Branco, G. (2019). Altered  
933 human oligodendrocyte heterogeneity in multiple sclerosis. *Nature*, 566(7745), 543–  
934 547. <https://doi.org/10.1038/s41586-019-0903-2>
- 935 Jumper, J., Evans, R., Pritzel, A., Green, T., Figurnov, M., Ronneberger, O.,  
936 Tunyasuvunakool, K., Bates, R., Žídek, A., Potapenko, A., Bridgland, A., Meyer, C.,  
937 Kohl, S. A. A., Ballard, A. J., Cowie, A., Romera-Paredes, B., Nikolov, S., Jain, R.,  
938 Adler, J., ... Hassabis, D. (2021). Highly accurate protein structure prediction with  
939 AlphaFold. *Nature*, 596(7873), 583–589. <https://doi.org/10.1038/s41586-021-03819-2>
- 940 Jung, M., Sommer, I., Schachner, M., & Nave, K.-A. (1996). Monoclonal Antibody O10  
941 Defines a Conformationally Sensitive Cell-Surface Epitope of Proteolipid Protein (PLP):  
942 Evidence that PLP Misfolding Underlies Dysmyelination in Mutant Mice. *The Journal of*  
943 *Neuroscience*, 16(24), 7920–7929.
- 944 Kagawa, T., Mekada, E., Shishido, Y., & Ikenaka, K. (1997). Immune System-Related CD9 Is  
945 Expressed in Mouse Central Nervous System Myelin at a Very Late Stage of  
946 Myelination. *J. Neurosci. Res*, 50, 312–320.
- 947 Kleopa, K. A., Orthmann, J. L., Enriquez, A., Paul, D. L., & Scherer, S. S. (2004). Unique  
948 distributions of the gap junction proteins connexin29, connexin32, and connexin47 in  
949 oligodendrocytes. *GLIA*, 47(4), 346–357. <https://doi.org/10.1002/glia.20043>



- 950 Klugmann, M., & Schwab, M. H. (1997). Assembly of CNS Myelin in the Absence of  
951 Proteolipid Protein. *Neuron*, 18, 59–70.
- 952 Kuharev, J., Navarro, P., Distler, U., Jahn, O., & Tenzer, S. (2015). In-depth evaluation of  
953 software tools for data-independent acquisition based label-free quantification.  
954 *Proteomics*, 15(18), 3140–3151. <https://doi.org/10.1002/pmic.201400396>
- 955 Lappe-Siefke, C., Goebbels, S., Gravel, M., Nicksch, E., Lee, J., Braun, P. E., Griffiths, I. R.,  
956 & Nave, K. A. (2003). Disruption of *Cnp1* uncouples oligodendroglial functions in axonal  
957 support and myelination. *Nature Genetics*, 33(3), 366–374.  
958 <https://doi.org/10.1038/ng1095>
- 959 Lee, Y., Morrison, B. M., Li, Y., Lengacher, S., Farah, M. H., Hoffman, P. N., Liu, Y.,  
960 Tsingalia, A., Jin, L., Zhang, P. W., Pellerin, L., Magistretti, P. J., & Rothstein, J. D.  
961 (2012). Oligodendroglia metabolically support axons and contribute to  
962 neurodegeneration. *Nature*, 487(7408), 443–448. <https://doi.org/10.1038/nature11314>
- 963 Leone, D. P., Genoud, S., Atanasoski, S., Grausenburger, R., Berger, P., Metzger, D.,  
964 Macklin, W. B., Chambon, P., & Suter, U. (2003). Tamoxifen-inducible glia-specific Cre  
965 mice for somatic mutagenesis in oligodendrocytes and Schwann cells. *Molecular and  
966 Cellular Neuroscience*, 22(4), 430–440. [https://doi.org/10.1016/S1044-7431\(03\)00029-0](https://doi.org/10.1016/S1044-7431(03)00029-0)
- 967 Loring, H. S., Parelkar, S. S., Mondal, S., & Thompson, P. R. (2020). Identification of the first  
968 noncompetitive SARM1 inhibitors. *Bioorganic and Medicinal Chemistry*, 28(18), 115644.  
969 <https://doi.org/10.1016/j.bmc.2020.115644>
- 970 Lüders, K. A., Nessler, S., Kusch, K., Patzig, J., Jung, R. B., Möbius, W., Nave, K. A., &  
971 Werner, H. B. (2019). Maintenance of high proteolipid protein level in adult central  
972 nervous system myelin is required to preserve the integrity of myelin and axons. *GLIA*,  
973 67(4), 634–649. <https://doi.org/10.1002/glia.23549>
- 974 Lüders, K. A., Patzig, J., Simons, M., Nave, K. A., & Werner, H. B. (2017). Genetic dissection  
975 of oligodendroglial and neuronal Plp1 function in a novel mouse model of spastic  
976 paraplegia type 2. *GLIA*, 65(11), 1762–1776. <https://doi.org/10.1002/glia.23193>
- 977 Lunn, E. R., Perry, V. H., Brown, M. C., & Gordon, S. (1989). Absence of Wallerian  
978 Degeneration does not Hinder Regeneration in Peripheral Nerve. *European Journal of  
979 Neuroscience*, 1(1), 27–33.
- 980 Mack, T. G. A., Reiner, M., Beirowski, B., Mi, W., Emanuelli, M., Wagner, D., Thomson, D.,  
981 Gillingwater, T., Court, F., Conforti, L., Fernando, F. S., Tarlton, A., Andressen, C.,  
982 Addicks, K., Magni, G., Ribchester, R. R., Perry, V. H., & Coleman, M. P. (2001).  
983 Wallerian degeneration of injured axons and synapses is delayed by a *Ube4b/Nmnat*  
984 chimeric gene. *Nature Neuroscience*, 4(12), 1199–1206. <https://doi.org/10.1038/nn770>
- 985 Mezzadra, R., Sun, C., Jae, L. T., Gomez-Eerland, R., de Vries, E., Wu, W., Logtenberg, M.  
986 E. W., Slagter, M., Rozeman, E. A., Hofland, I., Broeks, A., Horlings, H. M., Wessels, L.  
987 F. A., Blank, C. U., Xiao, Y., Heck, A. J. R., Borst, J., Brummelkamp, T. R., &  
988 Schumacher, T. N. M. (2017). Identification of CMTM6 and CMTM4 as PD-L1 protein  
989 regulators. *Nature*, 549(7670), 106–110. <https://doi.org/10.1038/nature23669>
- 990 Möbius, W., Cooper, B., Kaufmann, W. A., Imig, C., Ruhwedel, T., Snaidero, N., Saab, A. S.,  
991 & Varoqueaux, F. (2010). Electron microscopy of the mouse central nervous system.

- 992 *Methods in Cell Biology*, 96(C), 475–512. <https://doi.org/10.1016/S0091->  
993 679X(10)96020-2
- 994 Mukherjee, C., Kling, T., Russo, B., Miebach, K., Kess, E., Schifferer, M., Pedro, L. D.,  
995 Weikert, U., Fard, M. K., Kannaiyan, N., Rossner, M., Aicher, M. L., Goebbels, S., Nave,  
996 K. A., Krämer-Albers, E. M., Schneider, A., & Simons, M. (2020). Oligodendrocytes  
997 Provide Antioxidant Defense Function for Neurons by Secreting Ferritin Heavy Chain.  
998 *Cell Metabolism*, 32(2), 259-272.e10. <https://doi.org/10.1016/j.cmet.2020.05.019>
- 999 Osterloh, J. M., Yang, J., Rooney, T. M., Fox, A. N., Adalbert, R., Powell, E. H., Sheehan, A.  
1000 E., Avery, M. A., Hackett, R., Logan, M. A., MacDonald, J. M., Ziegenfuss, J. S., Milde,  
1001 S., Hou, Y. J., Nathan, C., Ding, A., Brown, R. H., Conforti, L., Coleman, M., ...  
1002 Freeman, M. R. (2012). dSarm/Sarm1 is required for activation of an injury-induced  
1003 axon death pathway. *Science*, 337(6093), 481–484.  
1004 <https://doi.org/10.1126/science.1223899>
- 1005 Ou, X., Sun, S. W., Liang, H. F., Song, S. K., & Gochberg, D. F. (2009). Quantitative  
1006 magnetization transfer measured pool-size ratio reflects optic nerve myelin content in Ex  
1007 vivo mice. *Magnetic Resonance in Medicine*, 61(2), 364–371.  
1008 <https://doi.org/10.1002/mrm.21850>
- 1009 Patzig, J., Erwig, M. S., Tenzer, S., Kusch, K., Dibaj, P., Möbius, W., Goebbels, S.,  
1010 Schaeren-Wiemers, N., Nave, K. A., & Werner, H. B. (2016). Septin/anillin filaments  
1011 scaffold central nervous system myelin to accelerate nerve conduction. *ELife*, 5,  
1012 e17119. <https://doi.org/10.7554/eLife.17119.001>
- 1013 Pei, M., Nguyen, T. D., Thimmappa, N. D., Salustri, C., Dong, F., Cooper, M. A., Li, J.,  
1014 Prince, M. R., & Wang, Y. (2015). Algorithm for fast monoexponential fitting based on  
1015 Auto-Regression on Linear Operations (ARLO) of data. *Magnetic Resonance in*  
1016 *Medicine*, 73(2), 843–850. <https://doi.org/10.1002/mrm.25137>
- 1017 Perez-Riverol, Y., Csordas, A., Bai, J., Bernal-Llinares, M., Hewapathirana, S., Kundu, D. J.,  
1018 Inuganti, A., Griss, J., Mayer, G., Eisenacher, M., Pérez, E., Uszkoreit, J., Pfeuffer, J.,  
1019 Sachsenberg, T., Yilmaz, Ş., Tiwary, S., Cox, J., Audain, E., Walzer, M., ... Vizcaíno, J.  
1020 A. (2019). The PRIDE database and related tools and resources in 2019: Improving  
1021 support for quantification data. *Nucleic Acids Research*, 47(D1), D442–D450.  
1022 <https://doi.org/10.1093/nar/gky1106>
- 1023 Philips, T., Mironova, Y. A., Jouroukhin, Y., Chew, J., Vidensky, S., Farah, M. H., Pletnikov,  
1024 M. v., Bergles, D. E., Morrison, B. M., & Rothstein, J. D. (2021). MCT1 Deletion in  
1025 Oligodendrocyte Lineage Cells Causes Late-Onset Hypomyelination and Axonal  
1026 Degeneration. *Cell Reports*, 34(2), 108610. <https://doi.org/10.1016/j.celrep.2020.108610>
- 1027 Provencher, S. W. (1993). Estimation of Metabolite Concentrations from Localized in Vivo  
1028 Proton NMR Spectra. In *Magnetic Resonance in Medicine* (Vol. 30, pp. 672–679).
- 1029 Rasband, M. N., Tayler, J., Kaga, Y., Yang, Y., Lappe-Siefke, C., Nave, K. A., & Bansal, R.  
1030 (2005). CNP is required for maintenance of axon-glia interactions at nodes of ranvier in  
1031 the CNS. *GLIA*, 50(1), 86–90. <https://doi.org/10.1002/glia.20165>
- 1032 Ridder, W. H., & Nusinowitz, S. (2006). The visual evoked potential in the mouse - Origins  
1033 and response characteristics. *Vision Research*, 46(6–7), 902–913.  
1034 <https://doi.org/10.1016/j.visres.2005.09.006>

- 1035 Roach, A., Takahashi, N., Pravtcheva, D., Ruddle, F., & Hood, L. (1985). Chromosomal  
1036 Mapping of Mouse Myelin Basic Protein Gene and Structure and Transcription of the  
1037 Partially Deleted Gene in Shiverer Mutant Mice. *Cell*, 42, 149–155.
- 1038 Saab, A. S., Tzvetavona, I. D., Trevisiol, A., Baltan, S., Dibaj, P., Kusch, K., Möbius, W.,  
1039 Goetze, B., Jahn, H. M., Huang, W., Steffens, H., Schomburg, E. D., Pérez-Samartín,  
1040 A., Pérez-Cerdá, F., Bakhtiari, D., Matute, C., Löwel, S., Griesinger, C., Hirrlinger, J., ...  
1041 Nave, K. A. (2016). Oligodendroglial NMDA Receptors Regulate Glucose Import and  
1042 Axonal Energy Metabolism. *Neuron*, 91(1), 119–132.  
1043 <https://doi.org/10.1016/j.neuron.2016.05.016>
- 1044 Samsam, M., Mi, W., Wessig, C., Zielasek, J., Toyka, K. v, Coleman, M. P., & Martini, R.  
1045 (2003). The Wlds Mutation Delays Robust Loss of Motor and Sensory Axons in a  
1046 Genetic Model for Myelin-Related Axonopathy. *The Journal of Neuroscience*, 23(7),  
1047 2833–2839.
- 1048 Schardt, A., Brinkmann, B. G., Mitkovski, M., Sereda, M. W., Werner, H. B., & Nave, K. A.  
1049 (2009). The SNARE protein SNAP-29 interacts with the GTPase Rab3A: Implications for  
1050 membrane trafficking in myelinating glia. *Journal of Neuroscience Research*, 87(15),  
1051 3465–3479. <https://doi.org/10.1002/jnr.22005>
- 1052 Schindelin, J., Arganda-Carreras, I., Frise, E., Kaynig, V., Longair, M., Pietzsch, T.,  
1053 Preibisch, S., Rueden, C., Saalfeld, S., Schmid, B., Tinevez, J. Y., White, D. J.,  
1054 Hartenstein, V., Eliceiri, K., Tomancak, P., & Cardona, A. (2012). Fiji: An open-source  
1055 platform for biological-image analysis. *Nature Methods*, 9(7), 676–682.  
1056 <https://doi.org/10.1038/nmeth.2019>
- 1057 Shao, L., Cui, Y., Li, H., Liu, Y., Zhao, H., Wang, Y., Zhang, Y., Ka, M. N., Han, W., Ma, D., &  
1058 Tao, Q. (2007). CMTM5 exhibits tumor suppressor activities and is frequently silenced  
1059 by methylation in carcinoma cell lines. *Clinical Cancer Research*, 13(19), 5756–5762.  
1060 <https://doi.org/10.1158/1078-0432.CCR-06-3082>
- 1061 Siems, S. B., Jahn, O., Eichel, M. A., Kannaiyan, N., Wu, L. M. N., Sherman, D. L., Kusch,  
1062 K., Hesse, D., Jung, R. B., Fledrich, R., Sereda, M. W., Rossner, M. J., Brophy, P. J., &  
1063 Werner, H. B. (2020). Proteome profile of peripheral myelin in healthy mice and in a  
1064 neuropathy model. *ELife*, 9, e51406. <https://doi.org/10.7554/eLife.51406>
- 1065 Silva, J. C., Gorenstein, M. v., Li, G. Z., Vissers, J. P. C., & Geromanos, S. J. (2006).  
1066 Absolute quantification of proteins by LCMSE: A virtue of parallel MS acquisition.  
1067 *Molecular and Cellular Proteomics*, 5(1), 144–156.  
1068 <https://doi.org/10.1074/mcp.M500230-MCP200>
- 1069 Stadelmann, C., Timmler, S., Barrantes-Freer, A., & Simons, M. (2019). Myelin in the Central  
1070 Nervous System: Structure, Function, and Pathology. *Physiol Rev*, 99, 1381–1431.  
1071 <https://doi.org/10.1152/physrev.00031.2018.-Oligodendro>
- 1072 Steyer, A. M., Ruhwedel, T., Nardis, C., Werner, H. B., Nave, K. A., & Möbius, W. (2020).  
1073 Pathology of myelinated axons in the PLP-deficient mouse model of spastic paraplegia  
1074 type 2 revealed by volume imaging using focused ion beam-scanning electron  
1075 microscopy. *Journal of Structural Biology*, 210(2), 107492.  
1076 <https://doi.org/10.1016/j.jsb.2020.107492>

- 1077 Tasaki, I. (1939). The electro-saltatory transmission of the nerve impulse and the effect of  
1078 narcosis upon the nerve fiber. *The American Journal of Physiology*, 127(2), 211–227.  
1079 <https://doi.org/10.1152/AJPLEGACY.1939.127.2.211>
- 1080 Trevisiol, A., Kusch, K., Steyer, A. M., Gregor, I., Nardis, C., Winkler, U., Köhler, S.,  
1081 Restrepo, A., Möbius, W., Werner, H. B., Nave, K. A., & Hirrlinger, J. (2020). Structural  
1082 myelin defects are associated with low axonal ATP levels but rapid recovery from  
1083 energy deprivation in a mouse model of spastic paraplegia. *PLoS Biology*, 18(11),  
1084 e3000943. <https://doi.org/10.1371/journal.pbio.3000943>
- 1085 Uschkureit, T., Spörkel, O., Stracke, J., Bü, H., & Stoffel, W. (2000). Early Onset of Axonal  
1086 Degeneration in Double (plp/mag/) and Hypomyelinoses in Triple (plp/mbp/mag/) Mutant  
1087 Mice. *The Journal of Neuroscience*, 20(14), 5225–5233.
- 1088 Wang, J., Zhai, Q., Chen, Y., Lin, E., Gu, W., McBurney, M. W., & He, Z. (2005). A local  
1089 mechanism mediates NAD-dependent protection of axon degeneration. *Journal of Cell*  
1090 *Biology*, 170(3), 349–355. <https://doi.org/10.1083/jcb.200504028>
- 1091 Weil, M. T., Heibeck, S., Töpferwien, M., Tom Dieck, S., Ruhwedel, T., Salditt, T., Rodicio,  
1092 M. C., Morgan, J. R., Nave, K. A., Möbius, W., & Werner, H. B. (2018). Axonal  
1093 ensheathment in the nervous system of lamprey: Implications for the evolution of  
1094 myelinating glia. *Journal of Neuroscience*, 38(29), 6586–6596.  
1095 <https://doi.org/10.1523/JNEUROSCI.1034-18.2018>
- 1096 Werner, H. B., Krämer-Albers, E. M., Strenzke, N., Saher, G., Tenzer, S., Ohno-Iwashita, Y.,  
1097 de Monasterio-Schrader, P., Möbius, W., Moser, T., Griffiths, I. R., & Nave, K. A. (2013).  
1098 A critical role for the cholesterol-associated proteolipids PLP and M6B in myelination of  
1099 the central nervous system. *GLIA*, 61(4), 567–586. <https://doi.org/10.1002/glia.22456>
- 1100 Wieser, G. L., Gerwig, U. C., Adamcio, B., Barrette, B., Nave, K. A., Ehrenreich, H., &  
1101 Goebbels, S. (2013). Neuroinflammation in white matter tracts of Cnp1 mutant mice  
1102 amplified by a minor brain injury. *GLIA*, 61(6), 869–880.  
1103 <https://doi.org/10.1002/glia.22480>
- 1104 Wolf, N. I., French-Constant, C., & van der Knaap, M. S. (2021). Hypomyelinating  
1105 leukodystrophies — unravelling myelin biology. *Nature Reviews Neurology*, 17(2), 88–  
1106 103. <https://doi.org/10.1038/s41582-020-00432-1>
- 1107 Xiao, Y., Yuan, Y., Zhang, Y., Li, J., Liu, Z., Zhang, X., Sheng, Z., Xu, T., & Wang, X. (2015).  
1108 CMTM5 is reduced in prostate cancer and inhibits cancer cell growth in vitro and in vivo.  
1109 *Clinical and Translational Oncology*, 17(6), 431–437. [https://doi.org/10.1007/s12094-](https://doi.org/10.1007/s12094-014-1253-z)  
1110 [014-1253-z](https://doi.org/10.1007/s12094-014-1253-z)
- 1111 Yuan, Y., Sheng, Z., Liu, Z., Zhang, X., Xiao, Y., Xie, J., Zhang, Y., & Xu, T. (2020). CMTM5-  
1112 v1 inhibits cell proliferation and migration by downregulating oncogenic EGFR signaling  
1113 in prostate cancer cells. *Journal of Cancer*, 11(13), 3762–3770.  
1114 <https://doi.org/10.7150/jca.42314>
- 1115 Zhang, Y., Chen, K., Sloan, S. A., Bennett, M. L., Scholze, A. R., O’Keefe, S., Phatnani, H.  
1116 P., Guarnieri, P., Caneda, C., Ruderisch, N., Deng, S., Liddelow, S. A., Zhang, C.,  
1117 Daneman, R., Maniatis, T., Barres, B. A., & Wu, J. Q. (2014). An RNA-sequencing  
1118 transcriptome and splicing database of glia, neurons, and vascular cells of the cerebral

1119 cortex. *Journal of Neuroscience*, 34(36), 11929–11947.

1120 <https://doi.org/10.1523/JNEUROSCI.1860-14.2014>

1121 Zhou, Y., Song, W. M., Andhey, P. S., Swain, A., Levy, T., Miller, K. R., Poliani, P. L.,  
1122 Cominelli, M., Grover, S., Gilfillan, S., Cella, M., Ulland, T. K., Zaitsev, K., Miyashita, A.,  
1123 Ikeuchi, T., Sainouchi, M., Kakita, A., Bennett, D. A., Schneider, J. A., ... Colonna, M.  
1124 (2020). Human and mouse single-nucleus transcriptomics reveal TREM2-dependent  
1125 and TREM2-independent cellular responses in Alzheimer's disease. *Nature Medicine*,  
1126 26(1), 131–142. <https://doi.org/10.1038/s41591-019-0695-9>

1127

1128



## 1129 **Figure legends**

1130

### 1131 **Figure 1: Identification of CMTM5 as a CNS myelin protein.**

1132 **(A)** Immunoblot analysis of CMTM5 in myelin biochemically purified from the brains C57/Bl6  
1133 mice at the age of 75 days compared to brain lysate with the same amount of protein loaded  
1134 onto the gel. Note that CMTM5 is enriched in myelin. Known myelin proteins PLP, CNP and  
1135 SIRT2 are detected as markers. Shown are three biological replicates.

1136 **(B)** Immunohistochemistry and confocal microscopy of spinal cord sections of mice at the age  
1137 of 75 days. Note that CMTM5 (magenta) labelling was consistent with localization in myelin  
1138 surrounding beta-III tubulin (TUJ1)-immunopositive axons (yellow) in CTRL (*Cmtm5<sup>fl/fl</sup>*) mice.  
1139 CMTM5 labelling was not detected in myelin of mice lacking *Cmtm5* expression in mature  
1140 oligodendrocytes (*Cmtm5<sup>fl/fl</sup>\*Cnp<sup>Cre/Wt</sup>*, cKO). Scale bar, 2  $\mu$ m.

1141 **(C, D)** Immunoblot analysis of CMTM5 in brain lysate **(C)** and biochemically purified myelin **(D)**  
1142 of young and aged mice. Note that CMTM5 abundance in brain lysate increases coinciding  
1143 with developmental myelination **(D)**. Shown is one biological replicate per age. PLP, CNP,  
1144 SIRT2 were detected as markers. P= postnatal day, m=months.

1145

1146

### 1147 **Figure 1-Supplement 1: *Cmtm5* mRNA is expressed in mature oligodendrocytes of mice** 1148 **and humans.**

1149 **(A, B)** Abundance of *Cmtm5* mRNA according to bulk RNAseq data of cells immunopanned  
1150 from mouse cortices (Zhang et al., 2014). Note that among all members of the CMTM family,  
1151 only *Cmtm5* mRNA is considerably expressed in MOL **(A)**. Increasing *Cmtm5* mRNA  
1152 expression coincides with maturation of cells of the oligodendrocyte lineage **(B)**. OPC,  
1153 oligodendrocyte precursor cells; NFO, newly formed oligodendrocyte; MOL, Mature  
1154 oligodendrocytes; FPKM, fragments per kilobase per million mapped fragments. Data  
1155 represented as mean  $\pm$  SEM.

1156 **(C, D)** Uniform manifold approximation and projection (UMAP) feature plots of scRNAseq data  
1157 derived from a previously published dataset (Zhou et al., 2020) shows enriched expression of  
1158 *Cmtm5* mRNA in mature oligodendrocytes (MOL) of mice **(C)**. *Mbp* serves as a marker gene  
1159 for MOL in mice **(D)**.

1160 **(E, F)** UMAP feature plots of scRNAseq data derived from a previously published dataset  
1161 (Jäkel et al., 2019) shows enriched expression of *CMTM5* mRNA in mature oligodendrocytes  
1162 (MOL) of the white matter in disease-unaffected human control samples **(E)**. *MBP* serves a  
1163 marker gene for human MOL **(F)**.

1164

1165



1166 **Figure 2: CMTM5 is not essential for myelin biogenesis and composition.**

1167 **(A)** Immunoblot analysis shows that CMTM5 is undetectable in myelin purified from the brains  
1168 of *Cmtm5<sup>fl/fl</sup>\*Cnp<sup>Cre/Wt</sup>* (cKO) mice. PLP, CNP, SIRT2 were detected as markers. Shown are  
1169 three biological replicates per genotype.

1170 **(B,B')** Quantitative proteome analysis of brain myelin reveals largely similar myelin  
1171 composition in *Cmtm5* cKO and CTRL mice. Analyzed were n=3 mice per genotype and 2  
1172 technical replicates per mouse (see **Figure 2B source data 1**). **(B)** Volcano plot with data  
1173 points representing log<sub>2</sub>-fold change and -log<sub>10</sub>-transformed q-values of 428 identified  
1174 proteins in cKO compared to CTRL myelin. Red dots highlight known myelin proteins. Stippled  
1175 lines indicate thresholds. CMTM5 is not displayed because it was not identified in *Cmtm5* cKO  
1176 myelin. **(B')** Heatmap showing the relative abundance of selected known myelin proteins in  
1177 *Cmtm5* cKO compared to control myelin. Data represents n=3 mice per genotype analyzed as  
1178 2 technical replicates per mouse (T1-T6). Note that the relative abundance of most myelin  
1179 proteins was essentially similar in cKO and CTRL myelin. In agreement with the immunoblot  
1180 analysis in **(A)** the abundance of CNP was about halved in *Cmtm5* cKO myelin reflecting that  
1181 the Cre driver line (*Cnp<sup>Cre/Wt</sup>*) possesses only one *Cnp* allele. CMTM5 was not detected (n.d.)  
1182 in cKO myelin.

1183 **(C-L)** Electron micrographs and quantitative assessment of myelin in CTRL and cKO optic  
1184 nerves at postnatal day 30 (P30) **(C-G)** and P75 **(H-L)**. Scale bar, 1µm. Percentage of  
1185 unmyelinated axons **(D, I)** and pathological myelin profiles is similar between the groups **(E,**  
1186 **J)**. Data correspond to all axons (on average more than 1500 axons) from 18-20 non-  
1187 overlapping random EM images from 4-5 animals per group. Two-tailed Student's t-test, **D:** p=  
1188 0.1003; **E:** p= 0.0598; **I:** p= 0.3937; **J:** p= 0.7269. Mean g-ratio **(F, K)** is similar between the  
1189 experimental groups at P30 and P75. Data corresponds to 180-200 axons randomly selected  
1190 from 18-20 EM images for each mouse. n= 4-5 mice per group. Two-tailed Student's t-test **F:**  
1191 p= 0.5839; **K:** p= 0.8821. **(G, L)** Scatter plot showing g-ratios in relation to respective axonal  
1192 diameters. No apparent shift between the experimental groups is detectable.

1193 **(M, N)** Immunohistochemistry and genotype-dependent quantification of CAII immune-positive  
1194 oligodendrocytes in a representative white matter tract (hippocampal fimbria) at P75. **(M)**  
1195 Representative fluorescence micrograph, stippled lines encircle CAII positive cells. Scale bar,  
1196 20 µm. **(N)** Number of CAII immunopositive cells number is similar in the fimbria of CTRL and  
1197 *Cmtm5* cKO mice. n= 5-6 mice per group, unpaired Student's t-test p= 0.5971. Bar graphs  
1198 give mean ± SEM; Data points in bar graphs represent individual mice.

1199

1200

1201 **Figure 2-Supplement 1: MRI of the brains of *Cmtm5* cKO mice.**

1202 **(A)** Magnetic resonance imaging (MRI)-based morphometry of brains from CTRL and *Cmtm5*  
1203 cKO mice at 8 months of age. Shown are representative genotype averaged (4 mice per  
1204 genotype) effective transverse relaxation rate ( $R_2^*$ ) MRI images.

1205 **(B-E)** Diffusion tensor imaging (DTI) indicates unchanged fractional anisotropy (FA), mean  
1206 diffusivity (MD), axial diffusivity (AD) and radial diffusivity (RD) in white and grey matter in  
1207 brains of *Cmtm5* cKO and CTRL mice. CC, Corpus callosum; Fim, Fimbria; Thal, Thalamus;  
1208 Cort, Cortex; AC, Anterior commissure. n=4 per genotype. Precise p-values are given in the  
1209 statistics section.

1210 **(F)** Magnetization transfer saturation index (MTsaT) is unaltered in *Cmtm5* cKO compared to  
1211 CTRL mice. Exact p-values are listed in the statistics section. All graphs give mean  $\pm$  SEM; all  
1212 data points represent individual mice.

1213

1214

1215 **Figure 2B source data 1. Label-free quantification of proteins in CNS myelin fractions**  
1216 **from *Cmtm5* cKO and control mice**

1217 Identification and quantification data of proteins detected in myelin by DRE-UDMSe. For each  
1218 of the two conditions, tryptic peptides derived from two technical replicates (replicate digestion)  
1219 per each of three biological replicates were analyzed by LC-MS (12 runs in total). Proteins  
1220 (FDR < 1%; 2 peptides/protein) and peptides (FDR < 1%;  $\geq 6$  amino acids) were identified by  
1221 database search against the UniprotKB/SwissProt mouse database using PLGS. Data were  
1222 post-processed with the software package ISOQuant to calculate absolute in-sample amounts  
1223 for each detected protein based on the TOP3 approach. Reported abundance values are  
1224 defined as the relative amount of each protein in respect to the sum over all detected proteins  
1225 (ppm: parts per million (w/w) of total protein). Typical contaminant proteins like albumin,  
1226 hemoglobins, and keratins were filtered. The  $-\log_{10}$ -transformed q-value (column  
1227  $\text{minuslog}_{10}q.\text{mod}$ ) was plotted against the  $\log_2$ -transformed fold change (column  $\text{logFC}$   
1228 *Cmtm5* cKO/CTRL) to obtain the volcano plot shown in Figure 2B. As no imputation of missing  
1229 values was performed, proteins exclusive for only one of the conditions do not appear in the  
1230 volcano plot, but are appended at the end of the list. Criteria for statistically significant  
1231 regulation were as follows: fold change of at least 2.0 ( $\text{logFC cKO/CTRL} > 1$ ) and q-value  
1232 below 0.01 ( $\text{minuslog}_{10}q.\text{mod} > 2.0$ ). Proteins are sorted in descending order for  $z_{\text{dist}}$  (see  
1233 column descriptions below).

1234

1235

1236 **Figure 3: *Cmtm5* deletion in oligodendrocytes causes axonopathy.**

1237 **(A-B)** Electron micrographs and genotype-dependent quantitative assessment of CTRL and  
1238 *Cmtm5* cKO optic nerves at P75. Scale bar, 1 $\mu\text{m}$ . **(A)** Arrowheads point at pathological axons.

1239 **(B)** Quantification of pathological profiles reveals progressive axonopathy in optic nerves of  
1240 *Cmtm5* cKO mice. n=4-5 mice per group, 18-20 random non-overlapping EM images analyzed,  
1241 Two-tailed Student's t-test P30 p= 0.0011; P75 p= 0.0191 with Welch's correction; P365  
1242 p<0.0001.

1243 **(C)** Quantitative assessment of axonal numbers on semithin optic nerve sections. n=4-5 mice  
1244 per group, data represents mean axon number in five 55  $\mu\text{m}^2$  rectangles per mouse randomly  
1245 distributed over the entire optic nerve. Axon numbers are significantly reduced at one year of  
1246 age according to Two-tailed Student's t-test P30 p= 0.1288; P75 p= 0.5993; P365 p=0.0499.

1247 **(D-E)** Electron micrographs and genotype-dependent quantitative assessment of spinal cord  
1248 white matter in 1 year old CTRL and *Cmtm5* cKO mice. Scale bar= 1 $\mu\text{m}$ . **(F)** Number of  
1249 pathological profiles is increased in spinal cord white matter of *Cmtm5* cKO mice. n=3-7 mice  
1250 per group, 20 non-overlapping random EM images per mouse, Two-tailed Student's t-test  
1251 p=0.0007. All bars show mean  $\pm$  SEM; all data points represent individual mice.

1252

1253

1254 **Figure 3-Supplement 1: *Cmtm5* deletion in oligodendrocytes does not affect the calibers**  
1255 **of healthy-appearing axons**

1256 **(A-C)** Quantitative assessment of mean axonal diameters in the optic nerves of *Cmtm5* cKO  
1257 mice, *Cmtm5*<sup>-/-</sup> mice and respective controls. Mean axonal diameters are similar between  
1258 CTRL and cKO mice at ages P75 **(A)** and P365 **(B)** as well as between *Cmtm5*<sup>-/-</sup> and control  
1259 mice at age P75 **(C)**. Two-sided Student's t-test. **A**; p=0.7514, **B**; p= 0.5315, **C**; p= 0.8496.

1260 700-800 optic nerve axons on 18-20 electron micrographs were analyzed per mouse in 4-5  
1261 mice per genotype and age. All bars show mean  $\pm$  SEM; all data points represent individual  
1262 mice. **(A'-C')** Frequency distributions of pooled axonal diameters in optic nerves of *Cmtm5*  
1263 cKO mice, *Cmtm5*<sup>-/-</sup> mice and respective controls. No apparent shift in axonal diameters was  
1264 detected between CTRL and cKO mice at ages P75 **(A')** and P365 **(B')** as well as between  
1265 *Cmtm5*<sup>-/-</sup> and control mice at age P75 **(C')**. Axonal diameters are the same as used for analysis  
1266 of mean axonal diameters in **A-C** but represent pools per genotype and timepoint.

1267

1268

1269 **Figure 3-Supplement 2: MRS of the corpus callosum of *Cmtm5* cKO mice**

1270 **(A, B)** Spectroscopy of key metabolic markers myo-inositol (for microglia and astrocytes, in **A**)  
1271 and N-acetyl-aspartate (NAA, for axon/neurons, in **B**). **(A)** The concentration of inositol is  
1272 significantly increased in the corpus callosum of *Cmtm5* cKO mice compared to controls. Two-  
1273 tailed Student's t-test of the mean p= 0.0004. **(B)** NAA levels are unchanged in the corpus  
1274 callosum of *Cmtm5* cKO mice compared to controls. Two-tailed Student's t-test of the mean  
1275 p= 0.057. All bar graphs give mean  $\pm$  SEM; all data points represent individual mice.

1276

1277

1278 **Figure 3-Supplement 3: Secondary neuropathology following *Cmtm5* deletion.**

1279 Quantitative assessment of immunohistochemistry detecting neuropathological markers in a  
1280 representative white matter tract (hippocampal fimbria) using markers for axonal swellings  
1281 (APP), microglia (MAC3, IBA1) and astroglia (GFAP) at ages P30 (**A-D**), P75 (**E-H**) and 1 year  
1282 (**I-L**). Given is the number of APP-immunopositive axonal swellings (**A, E, I**) the relative area  
1283 of immunopositivity for MAC3 (**B, F, J**), IBA1 (**C, G, K**) and GFAP (**D, H, L**). Note that *Cmtm5*  
1284 cKO fimbriae display a significant increase of all assessed neuropathological markers at one  
1285 year of age. n=3-6 mice per group, Two-tailed Student's t-test **A**: p= 0.3225; **B**: p= 0.7901; **C**:  
1286 p= 0.9480; **D**: p=0.9152; **E**: p=0.4413; **F**: With Welch's correction p= 0.0525; **G**: With Welch's  
1287 correction p= 0.9049; **H**: p=0.6270; **I**: p= 0.0055; **J**: With Welch's correction p=0.0251; **K**: With  
1288 Welch's correction p<0.0001; **L**: p<0.0001. Bar graphs give mean ± SEM.

1289

1290

1291 **Figure 4: FIB-SEM analysis specifies pathological profiles in *Cmtm5* cKO mice.**

1292 Focused ion beam-scanning electron microscopy (FIB-SEM) micrographs (**A-D**) and 3-  
1293 dimensional (3D) reconstruction (**A'-D'**) of pathological profiles in *Cmtm5* cKO optic nerve at 1  
1294 year of age. **A-C** Scale bar = 1µm. **D** Scale bar = 500 nm. Myelin (cyan), axons (gold), inclusion  
1295 (purple) and myelin whorls (blue) are highlighted. Pathological profiles include myelin  
1296 outfoldings, inclusions in the inner tongue, inclusions completely engulfed by axoplasm, and  
1297 myelin whorls. Analysis of the entire 3D volumes reveals that the relative number of myelin  
1298 whorls is significantly increased in cKO mice. FIB-SEM stacks of optic nerves of three mice  
1299 per genotype were analyzed. Normalized volume = 10000µm<sup>3</sup>. Two-tailed Student's t-test **A''**:  
1300 p= 0.1882; **B''**: p= 0.2190; **C''**: p= 0.2111; **D''**: p=0.0017. Scale bars 1 µm in **A-C**, 500nm in  
1301 **D**. Bar graphs give mean ± SEM.

1302

1303

1304 **Figure 5: Electroretinography and visual evoked potentials of *Cmtm5* cKO mice**

1305 (**A-D**) Electroretinograms (ERG). (**A**) ERG waveforms in response to light flashes at 0.25 cd-  
1306 s/m<sup>2</sup> from 11 *Cmtm5* cKO (grand average turquoise, SEM shaded) and 10 CTRL mice (grand  
1307 average grey, SEM shaded). (**B**) ERG thresholds are similar between CTRL and *Cmtm5* cKO.  
1308 Unpaired Student's t-test of the mean ±SEM p= 0.13 (**C,D**) Amplitudes of the ERG A and B  
1309 waves in response to light flashes of varying intensities in *Cmtm5* cKO (n=11, turquoise) and  
1310 CTRL mice (n=11, grey; mean ± SEM) are similar between genotypes. 2-way ANOVA (**C**) p=  
1311 0.42, (**D**) p= 0.79.

1312 **(E-H)** Visual evoked potentials (VEP). **(E)** VEP in response to light flashes at 0.01 cd-s/m<sup>2</sup> from  
1313 10 *Cmtm5* cKO (grand average turquoise, SEM shaded) and 9 CTRL mice (grand average  
1314 grey, SEM shaded) display comparable waveforms dominated by a broad negative wave in  
1315 both genotypes. **(F)** VEP thresholds are not significantly different between CTRL and *Cmtm5*  
1316 cKO. Unpaired Student's t-test of the mean  $\pm$ SEM with Welch's correction  $p=0.33$  **(G-H)** VEP  
1317 latencies and amplitudes in response to light flashes of varying intensities in *Cmtm5* cKO  
1318 (n=10, turquoise) and CTRL mice (n=8, grey; means  $\pm$  SEM). Note that *Cmtm5* cKO and CTRL  
1319 mice show similar VEP latencies but *Cmtm5* cKO mice display reduced VEP amplitudes  
1320 compared to CTRL mice. 2-way ANOVA **(G)**  $p=0.61$  **(H)**  $p=0.005$ .

1321

1322

1323 **Figure 6: Axonopathy in constitutive and tamoxifen-induced *Cmtm5* mutants.**

1324 **(A-C)** Analysis of mice lacking *Cmtm5* expression from all cells (*Cmtm5*<sup>-/-</sup> mice) and respective  
1325 controls. **(A)** Immunoblot confirms absence of CMTM5 in myelin purified from the brains of  
1326 *Cmtm5*<sup>-/-</sup> mice. CNP and SIRT2 were detected as controls. **(B)** Representative electron  
1327 micrographs of *Cmtm5*<sup>-/-</sup> and respective control optic nerves. Arrowhead points at pathological  
1328 profile. Scale bar, 1 $\mu$ m. **(C)** Quantitative assessment of 18-20 random non-overlapping EM  
1329 micrographs from 4-6 mice per group. Note the progressive increase in pathological appearing  
1330 axons in optic nerves of *Cmtm5*<sup>-/-</sup> mice. P75:  $p=0.0406$  by Two-sided Student's t-test with  
1331 Welch's Correction; P365:  $p<0.0001$  two-sided Student's t-test.

1332 **(D-F)** Analysis of mice lacking *Cmtm5* expression in mature oligodendrocytes upon induction  
1333 by tamoxifen (*Cmtm5*<sup>fl/fl</sup>\**Plp*<sup>CreERT2</sup>, iKO) and respective tamoxifen-injected *Cre*<sup>ERT2</sup>-negative  
1334 controls (*Cmtm5*<sup>fl/fl</sup>, CTRL). **(D)** Immunoblot of myelin purified from the brains of mice 4 months  
1335 post Tamoxifen injection (PTI). Note that the abundance of CMTM5 is strongly reduced in  
1336 *Cmtm5* iKO myelin. PLP and SIRT2 were detected as controls. **(E)** Representative electron  
1337 micrographs of *Cmtm5* iKO and CTRL optic nerves. Arrowhead points at pathological profile.  
1338 Scale bar, 1 $\mu$ m. **(F)** Quantification of pathological profiles (20 non-overlapping random images  
1339 per mouse, n=5 mice per genotype). Number of pathological profiles is significantly increased  
1340 4 months PTI ( $p=0.0282$  by Two-sided Student's t-test with Welch's correction). Bar graphs  
1341 give mean  $\pm$  SEM; data points represent individual mice.

1342

1343

1344 **Figure 6-Supplement 1: Absence of evidence that the abundance of CMTM5 is altered**  
1345 **in CNS myelin of *Plp* or *Cnp* deficient mice.**

1346 **(A, B)** Immunoblot analysis of myelin purified from the brains of *Cnp*<sup>-/-</sup> **(A)** and *Plp*<sup>-/-</sup> **(B)** mice  
1347 and respective controls at P75. Note that the relative abundance of CMTM5 in myelin appears  
1348 similar. Blots show n=2 mice per genotype. Carbonic anhydrase 2 (CAII) served as control.



1349

1350

1351 **Figure 7: Axonopathy upon *Cmtm5* deletion counteracted by the *Wld<sup>s</sup>* mutation.**

1352 **(A)** Retinae dissected from *Cmtm5* cKO and CTRL mice were immunolabelled with antibodies  
1353 detecting RBPMS as a marker for Retinal ganglion cells (RGC). Image representative of n=3  
1354 retinae. Scale bar= 500  $\mu$ m. **(B)** Magnification of the inner, middle and outer part of the retina.  
1355 **(C)** Quantitative assessment indicates that the number of RGCs is similar between *Cmtm5*  
1356 cKO and CTRL mice. Retinae of 1 year old mice were analyzed. Data represent the mean of  
1357 3 non-overlapping areas assessed for each zone (inner, middle outer retina), as indicated by  
1358 the white boxes in **(A)**. Unpaired Two-sided Student's t-test inner part: p= 0.8484; middle part:  
1359 p= 0.5211; outer part: p= 0.2912.

1360 **(D-E)** Electron micrographs and genotype-dependent quantification of pathological profiles in  
1361 the optic nerves of *Cmtm5*<sup>-/-</sup> and control mice in dependence of the *Wld<sup>s</sup>* mutation at 6 months.  
1362 Representative electron micrographs; arrowheads point at pathological profiles. Scale bar,  
1363 1 $\mu$ m. **(E)** Quantification of pathological profiles in the optic nerves of 6 months old mice. Note  
1364 that *Cmtm5* deletion causes an increased number of pathological profiles, which is reduced by  
1365 the presence of the *Wld<sup>s</sup>* mutation. Data correspond to optic nerves from 4-5 mice per group  
1366 and 20 random non-overlapping EM images analyzed. Unpaired Two-sided Student's t-test  
1367 *Cmtm5*<sup>wt/wt</sup>: p= 0.5107; *Cmtm5*<sup>-/-</sup>: p= 0.0014. Bar graphs give mean  $\pm$  SEM; data points  
1368 represent individual mice.

1369

1370

1371 **Immunoblot Source data files**

1372 **Figure 1A source data 1.** Immunoblot of CMTM5 in Figure 1A

1373 **Figure 1A source data 2.** Immunoblot of PLP in Figure 1A

1374 **Figure 1A source data 3.** Immunoblot of CNP in Figure 1A

1375 **Figure 1A source data 4.** Immunoblot of SIRT2 in Figure 1A

1376

1377 **Figure 1C source data 1.** Immunoblot of CMTM5 in Figure 1C at P15-P24 and 6m-24m

1378 **Figure 1C source data 2.** Immunoblot of PLP in Figure 1C at P15-P24

1379 **Figure 1C source data 3.** Immunoblot of PLP in Figure 1C at 6m-24m

1380 **Figure 1C source data 4.** Immunoblot of CNP in Figure 1C at P15-P24

1381 **Figure 1C source data 5.** Immunoblot of CNP in Figure 1C at 6m-24m

1382 **Figure 1C source data 6.** Immunoblot of SIRT2 in Figure 1C at P15-P24

1383 **Figure 1C source data 7.** Immunoblot of SIRT2 in Figure 1C at 6m-24m

1384

1385 **Figure 1D source data 1.** Immunoblot of CMTM5 in Figure 1D at P15-P24



1386 **Figure 1D source data 2.** Immunoblot of CMTM5 in Figure 1D at 6m-24m  
1387 **Figure 1D source data 3.** Immunoblot of PLP in Figure 1D at P15-P24  
1388 **Figure 1D source data 4.** Immunoblot of PLP in Figure 1D at 6m-24m  
1389 **Figure 1D source data 5.** Immunoblot of CNP in Figure 1D at P15-P24  
1390 **Figure 1D source data 6.** Immunoblot of CNP in Figure 1D at 6m-24m  
1391 **Figure 1D source data 7.** Immunoblot of SIRT2 in Figure 1D at P15-P24  
1392 **Figure 1D source data 8.** Immunoblot of SIRT2 in Figure 1D at 6m-24m  
1393  
1394 **Figure 2A source data 1.** Immunoblot of CMTM5 and SIRT2 in Figure 2A  
1395 **Figure 2A source data 2.** Immunoblot of CNP in Figure 2A  
1396 **Figure 2A source data 3.** Immunoblot of PLP in Figure 2A  
1397  
1398 **Figure 6A source data 1.** Immunoblot of CMTM5 in Figure 6A  
1399 **Figure 6A source data 2.** Immunoblot of CNP in Figure 6A  
1400 **Figure 6A source data 3.** Immunoblot of SIRT2 in Figure 6A  
1401  
1402 **Figure 6D source data 1.** Immunoblot of CMTM5 in Figure 6D  
1403 **Figure 6D source data 2.** Immunoblot of PLP in Figure 6D  
1404 **Figure 6D source data 3.** Immunoblot of SIRT2 in Figure 6D  
1405  
1406 **Figure 6 Supplement 1A source data 1.** Immunoblot of CMTM5 in Figure 6 Supplement 1A  
1407 **Figure 6 Supplement 1A source data 2.** Immunoblot of CAII in Figure 6 Supplement 1A  
1408 **Figure 6 Supplement 1A source data 3.** Immunoblot of CNP in Figure 6 Supplement 1A  
1409  
1410 **Figure 6 Supplement 1B source data 1.** Immunoblot of CMTM5 in Figure 6 Supplement 1B  
1411 **Figure 6 Supplement 1B source data 2.** Immunoblot of CAII in Figure 6 Supplement 1B  
1412 **Figure 6 Supplement 1B source data 3.** Immunoblot of PLP in Figure 6 Supplement 1B  
1413  
1414 **Source Data blots labelled.** Immunoblots with the relevant bands labelled.  
1415  
1416

1417

| <b>Feature</b>                     | <b><i>Cmtm5</i> mutants</b> | <b><i>Cnp</i> mutants</b>                                                                | <b><i>Plp</i> mutants</b>                                                                    |
|------------------------------------|-----------------------------|------------------------------------------------------------------------------------------|----------------------------------------------------------------------------------------------|
| Myelinated axons [%]               | Normal                      | Reduced                                                                                  | Reduced                                                                                      |
| Myelin thickness                   | Normal                      | Trend to thinner myelin                                                                  | Normal-appearing                                                                             |
| Myelin structure                   | Normal                      | Inner tongue swellings, myelin outfoldings                                               | Lamella splittings, myelin outfoldings                                                       |
| Axonopathy                         | Early onset, progressive    | Early onset, progressive                                                                 | Early onset, progressive                                                                     |
| Modified by <i>Wld<sup>S</sup></i> | Reduction of pathology      | No effect                                                                                | No effect                                                                                    |
| APP <sup>+</sup> axonal swellings  | Late onset                  | Early onset                                                                              | Early onset                                                                                  |
| Microgliosis                       | Late onset                  | Early onset                                                                              | Early onset                                                                                  |
| Astrogliosis                       | Late onset                  | Early onset                                                                              | Early onset                                                                                  |
| References                         | This study                  | Edgar et al., 2009; Lappe-Siefke et al., 2003; Patzig et al., 2016; Rasband et al., 2005 | (Edgar et al., 2004; Griffiths I et al., 1998; Klugmann & Schwab, 1997; Patzig et al., 2016) |

1418 **Table 1. Comparison of neuropathological features in *Cmtm5*, *Cnp* and *Plp* mutant mice.**

1419 Neuropathological features in *Cmtm5* cKO, *Cnp*<sup>-/-</sup> and *Plp*<sup>-Y</sup> mutant mice and key references  
 1420 are given. APP, amyloid precursor protein.

1421

1422

1423

| Antigen               | Host species | Method, dilution       | Source and Catalog #                                         |
|-----------------------|--------------|------------------------|--------------------------------------------------------------|
| α-APP                 | Mouse        | IHC 1:1000             | Chemicon (#MAB348)                                           |
| α-CAII                | Rabbit       | IB 1:500,<br>IHC 1:300 | (Ghandour et al., 1980)                                      |
| α-CMTM5               | Rabbit       | IB 1:1000              | Proteintech, Pineda (Custom made)<br>Sequence: YRTELMPSSTEGD |
| α-CMTM5               | Rabbit       | IHC 1:200              | Pineda (Custom made)<br>Sequence: CAFKIYRTELMPSSTEGDQQ       |
| α-CNP                 | Mouse        | IB 1:1000              | Sigma Aldrich (#SAB1405637)                                  |
| α-GFAP                | Mouse        | IHC 1:200              | Novo Castra (#NCL-L-GFAP-GA5)                                |
| α-IBA1                | Goat         | IHC 1:1000             | abcam (#ab5076)                                              |
| α-MAC3                | Rat          | IHC 1:400              | PharMingen (#553322)                                         |
| α-PLP                 | Rabbit       | IB 1:2000              | A431, (Jung et al., 1996)                                    |
| α-RBPMS               | Guinea Pig   | IHC 1:300              | Sigma Aldrich (#ABN1376)                                     |
| α-SIRT2               | Rabbit       | IB 1:500               | abcam (#ab67299)                                             |
| α-TUJ1                | Mouse        | IHC 1:1000             | Covance (#MMS-435P)                                          |
| α-mouse HRP           | Goat         | IB 1:10000             | Dianova (# 115-03-003)                                       |
| α-rabbit HRP          | Goat         | IB 1:10000             | Dianova (# 111-035-003)                                      |
| α-rabbit Alexa555     | Donkey       | IHC 1:1000             | Dianova (#SBA-3030-32)                                       |
| α-guinea pig Alexa555 | Donkey       | IHC 1:1000             | Dianova                                                      |
| α-mouse STAR RED      | Goat         | IHC 1:200              | abberior (# STRED- 1001-500UG)                               |
| α-rabbit STAR ORANGE  | Goat         | IHC 1:200              | abberior (# STORANGE-1002-500UG)                             |

1424 **Table 2: Antibody information**

1425 IHC, immunohistochemistry; IB, immunoblot

1426

Buscham et al., Figure 1

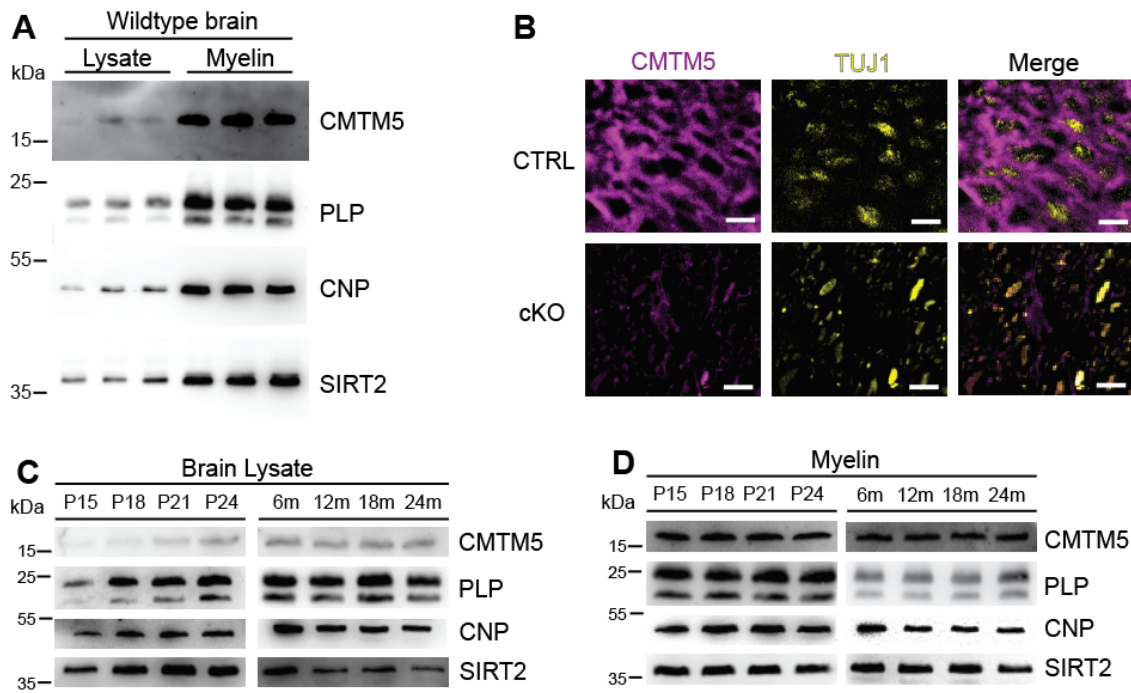

1427

1428

Buscham et al., Figure 1 Supplement 1

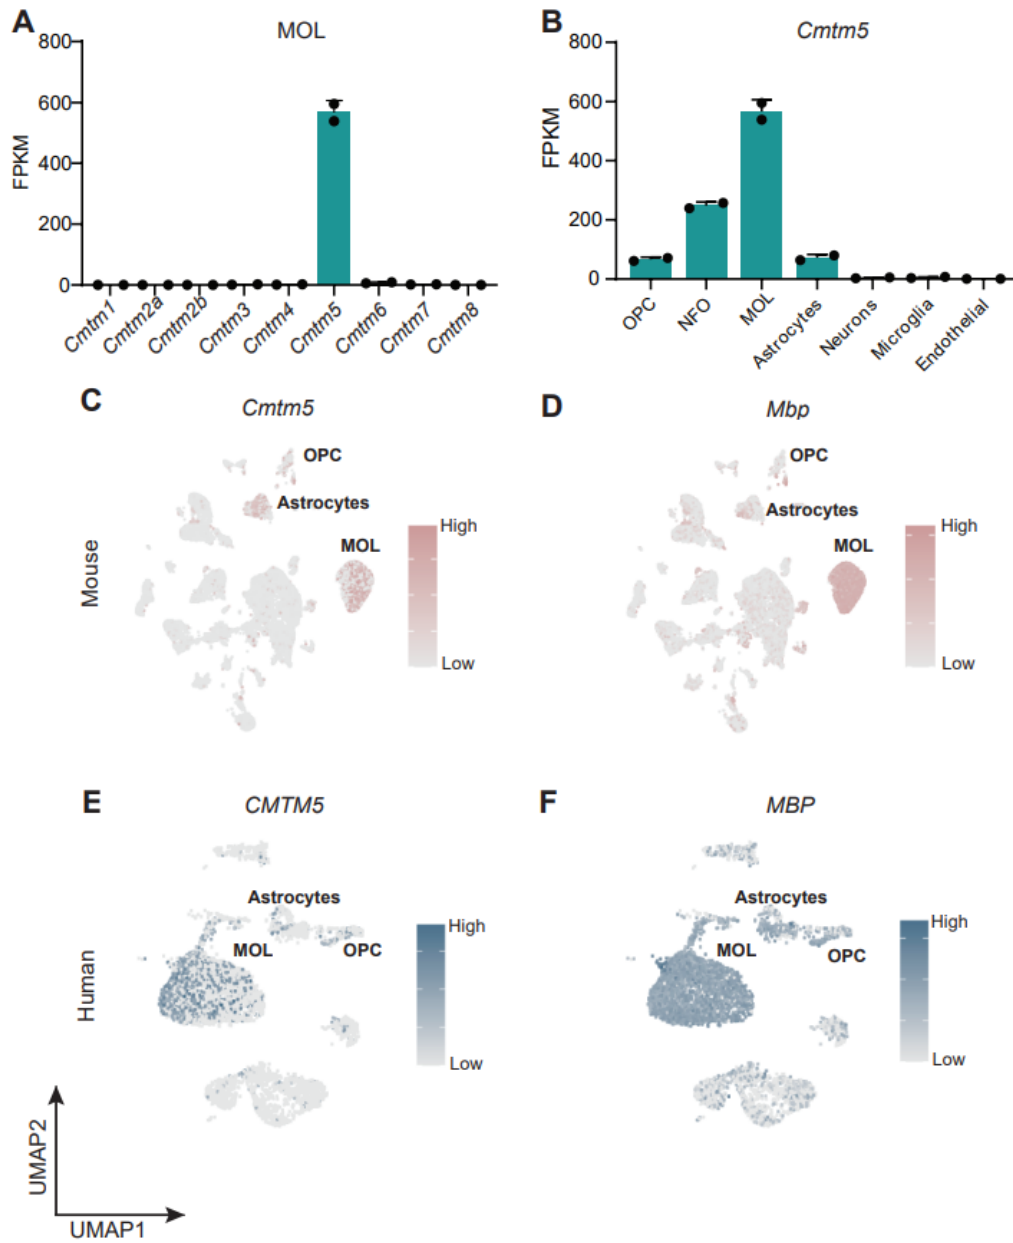

1429

1430



Buscham et al., Figure 2

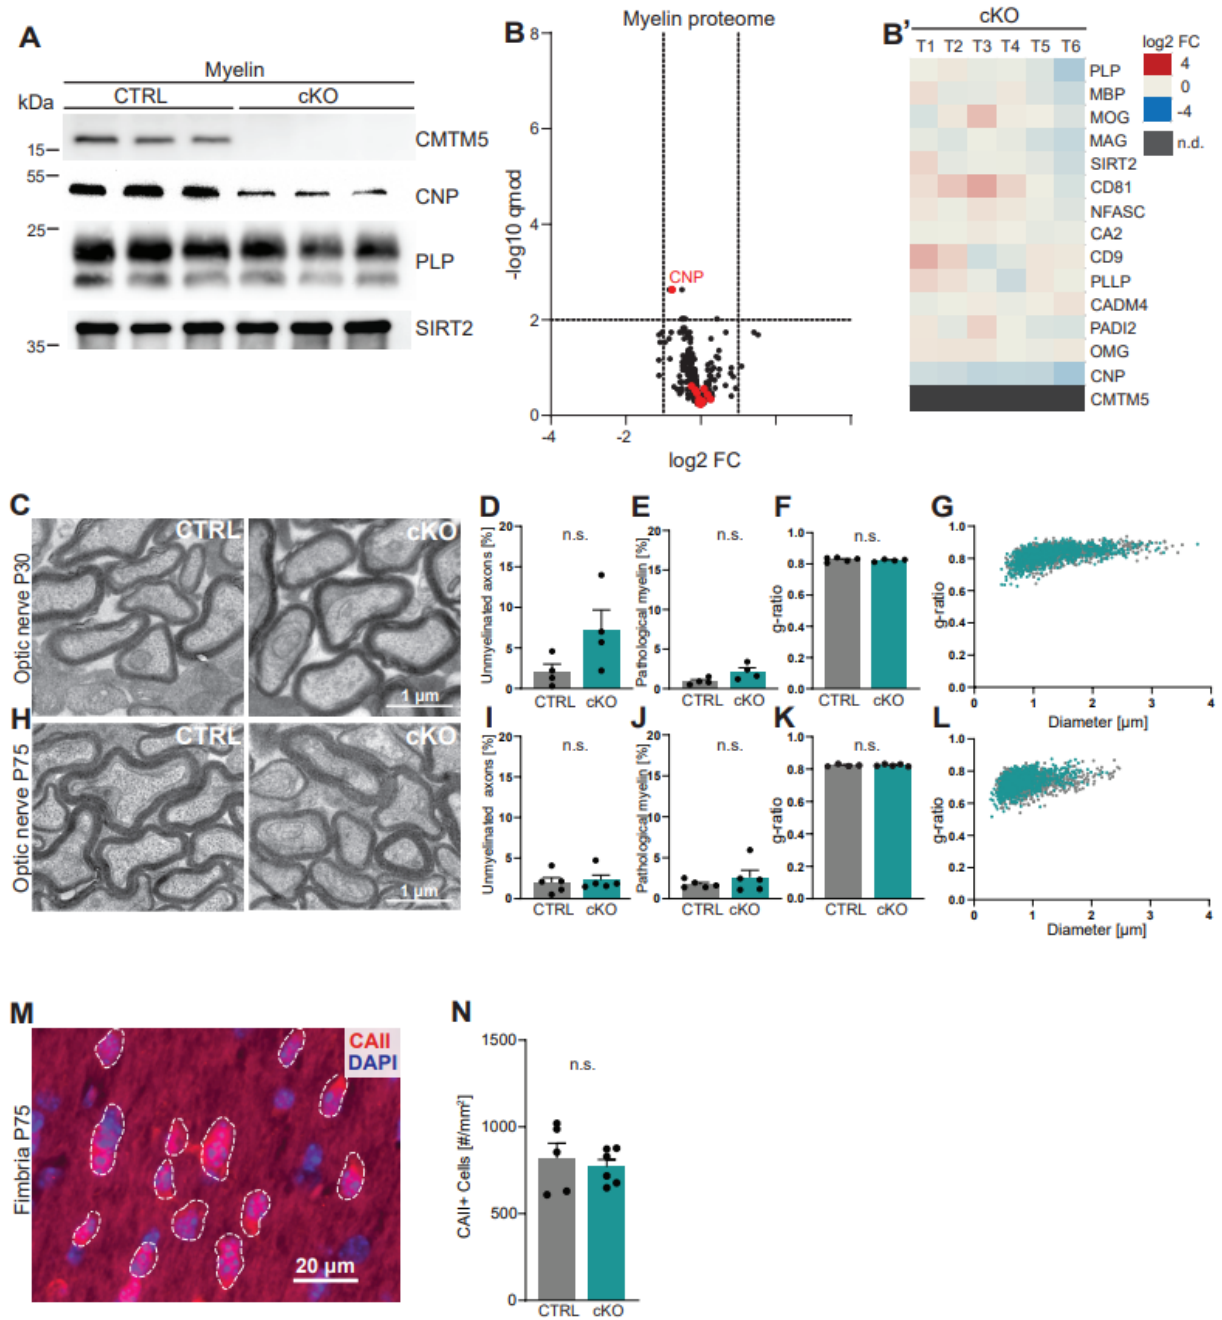

1431

1432

Buscham et al., Figure 2 Supplement 1

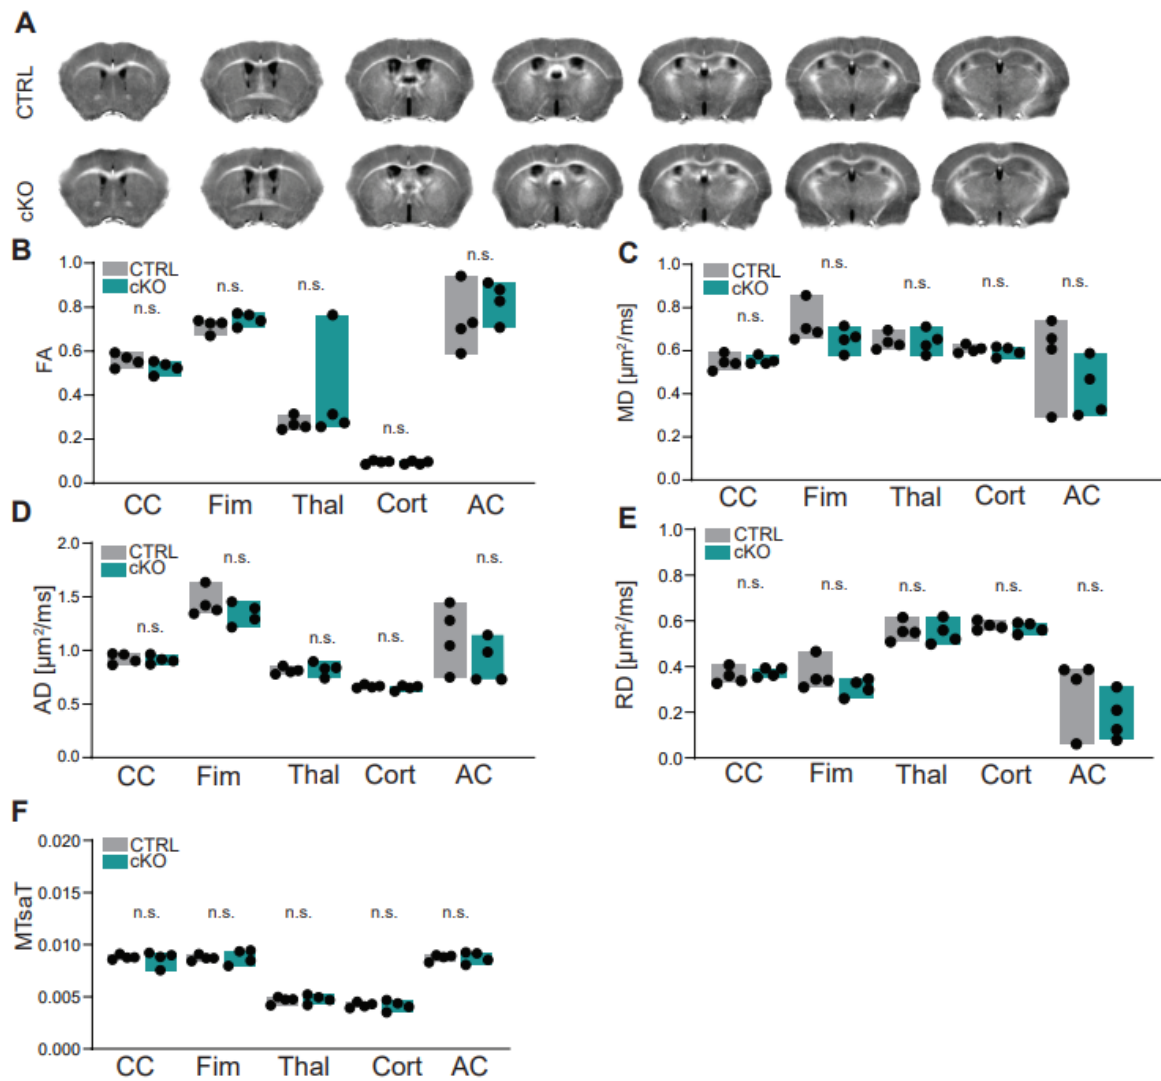

1433

1434

Buscham et al., Figure 3

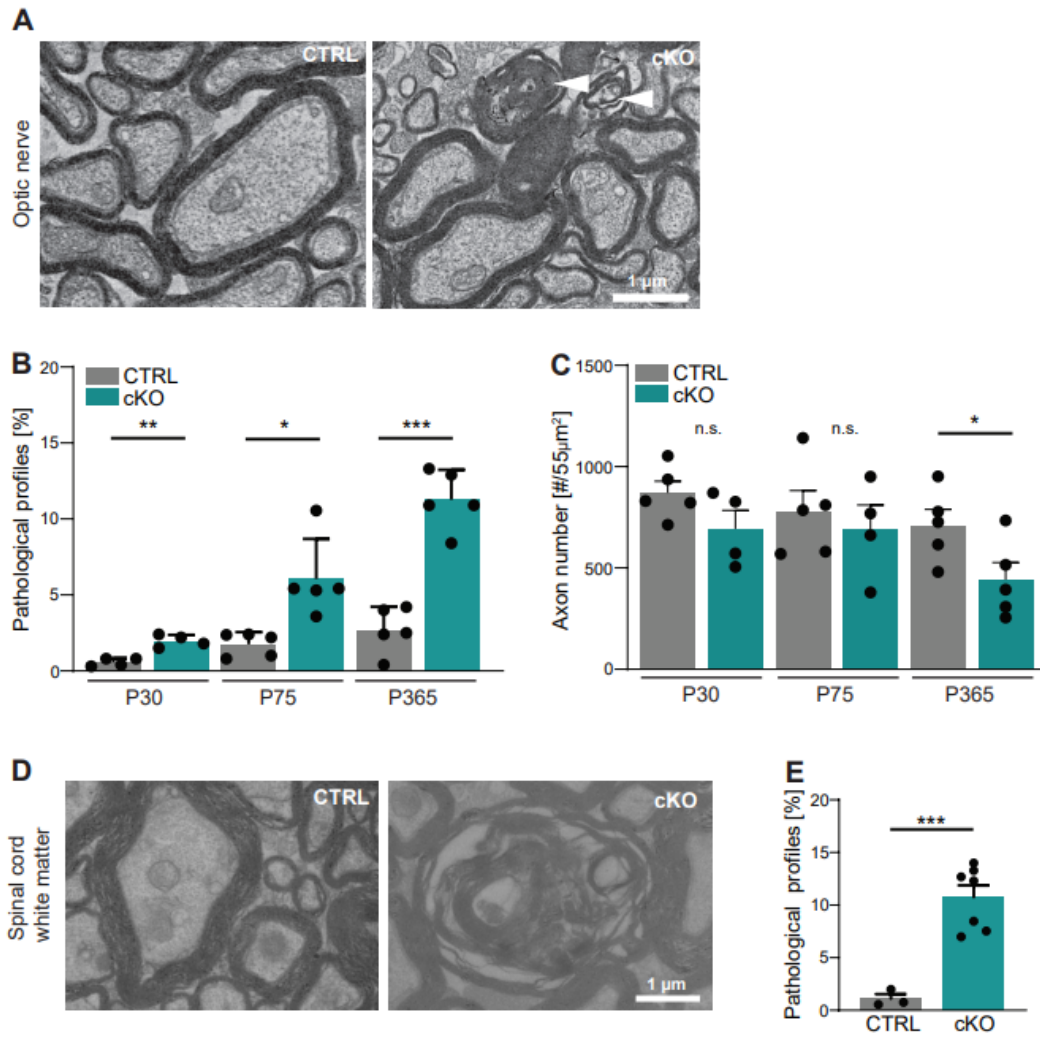

1435

1436

Buscham et al., Figure 3 Supplement 1

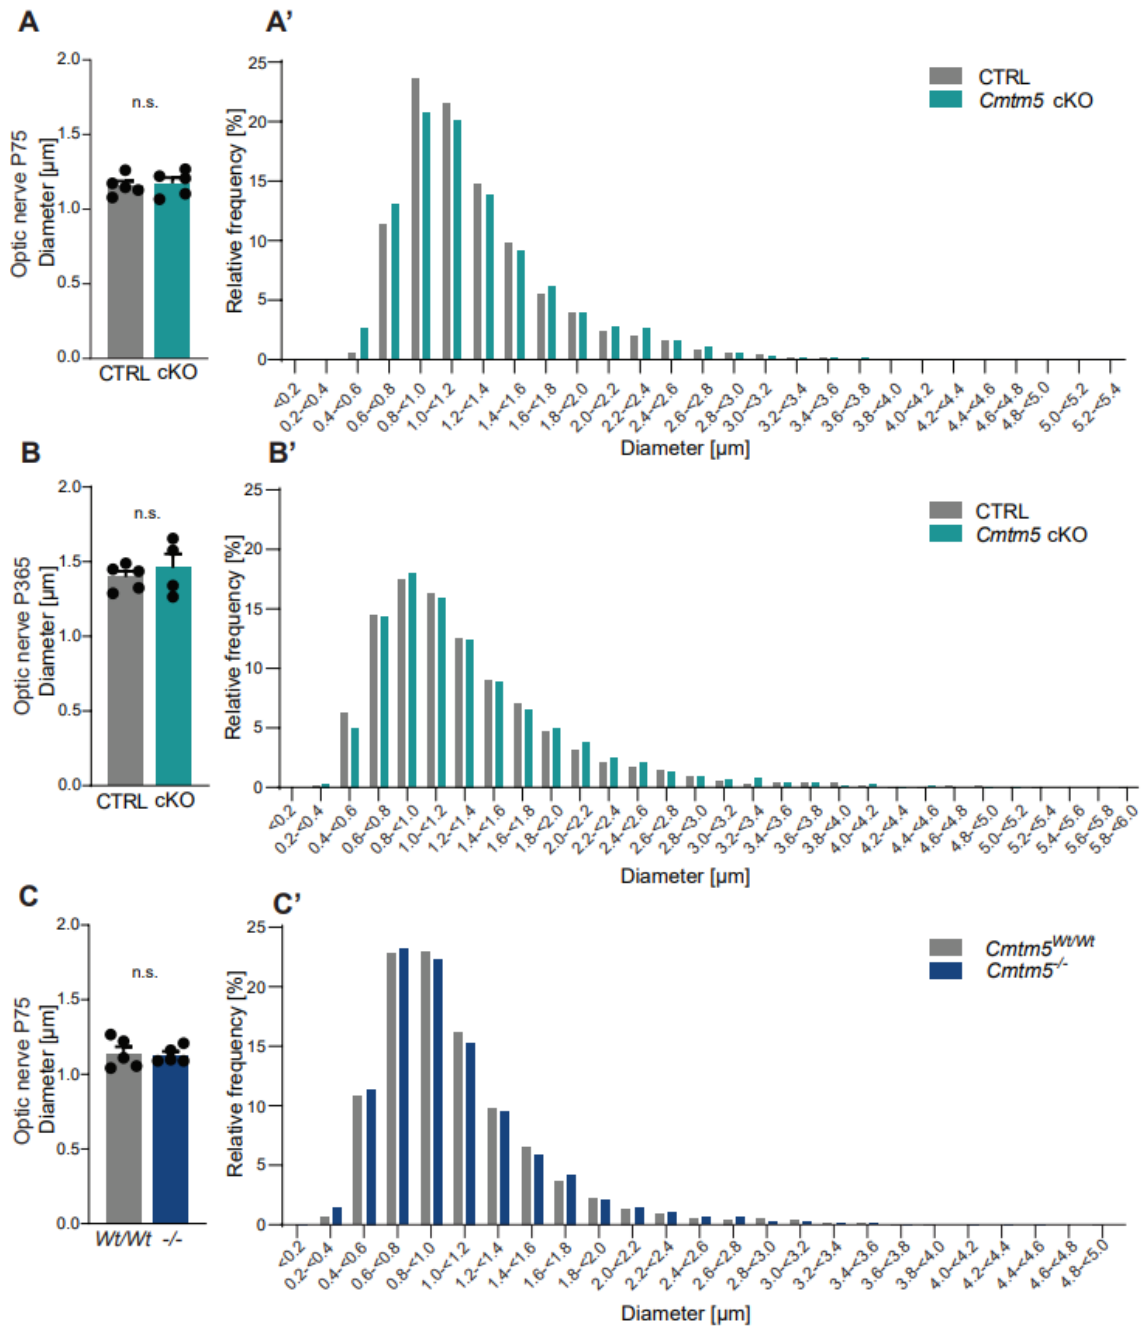

1437

1438

Buscham et al., Figure 3 Supplement 2

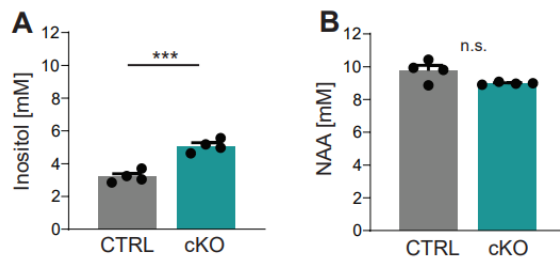

1439

1440



Buscham et al., Figure 3 Supplement 3

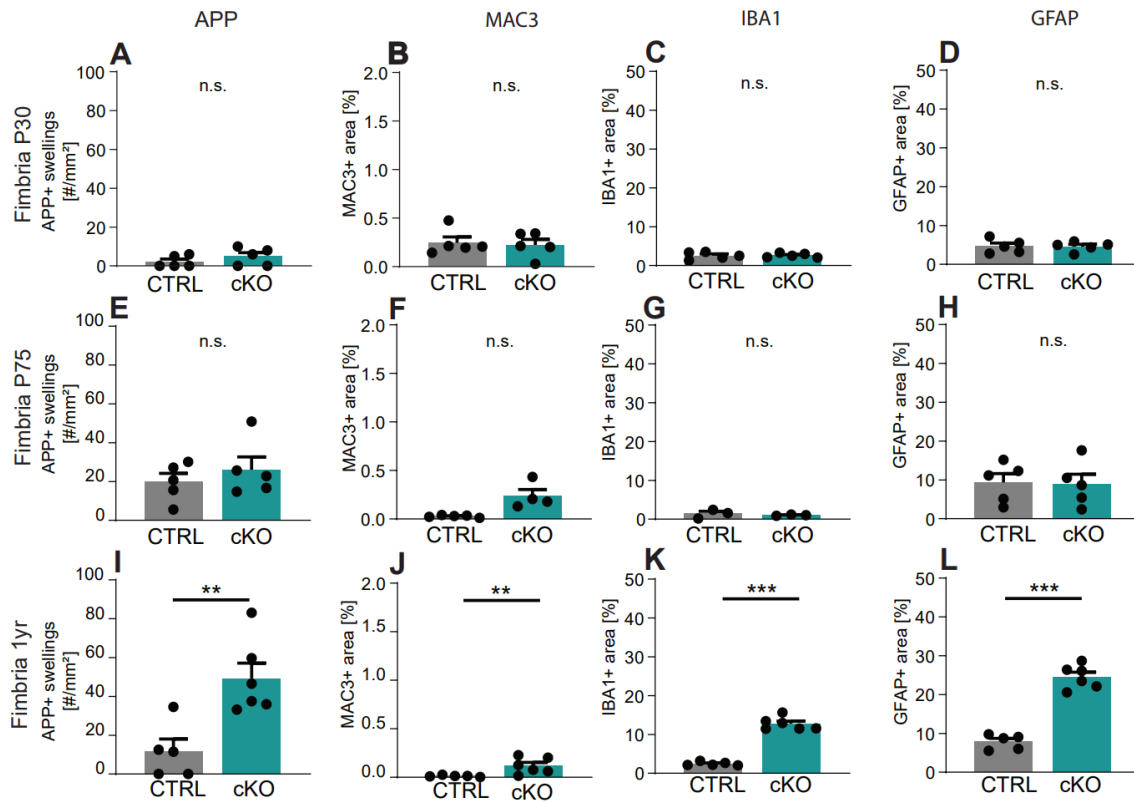

1441

1442

Buscham et al., Figure 4

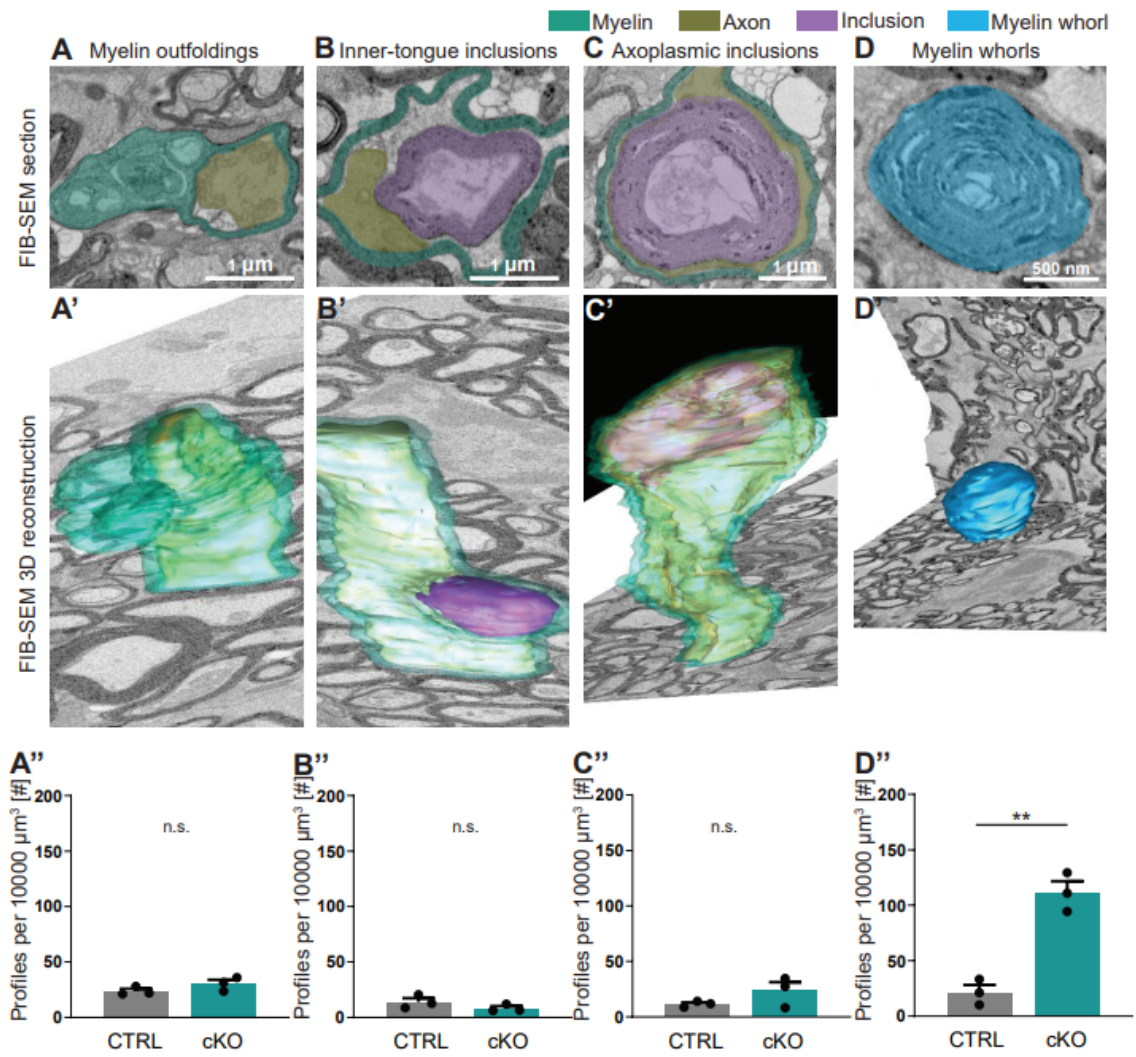

1443

1444

Buscham et al., Figure 5

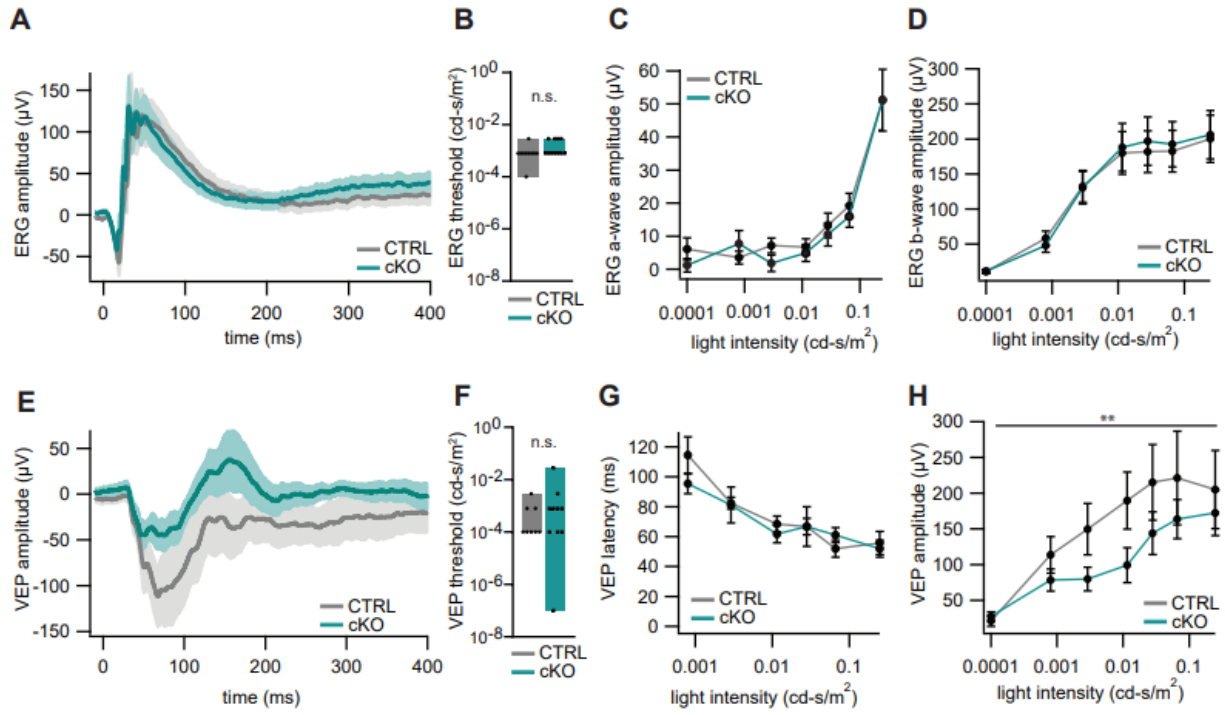

1445

1446

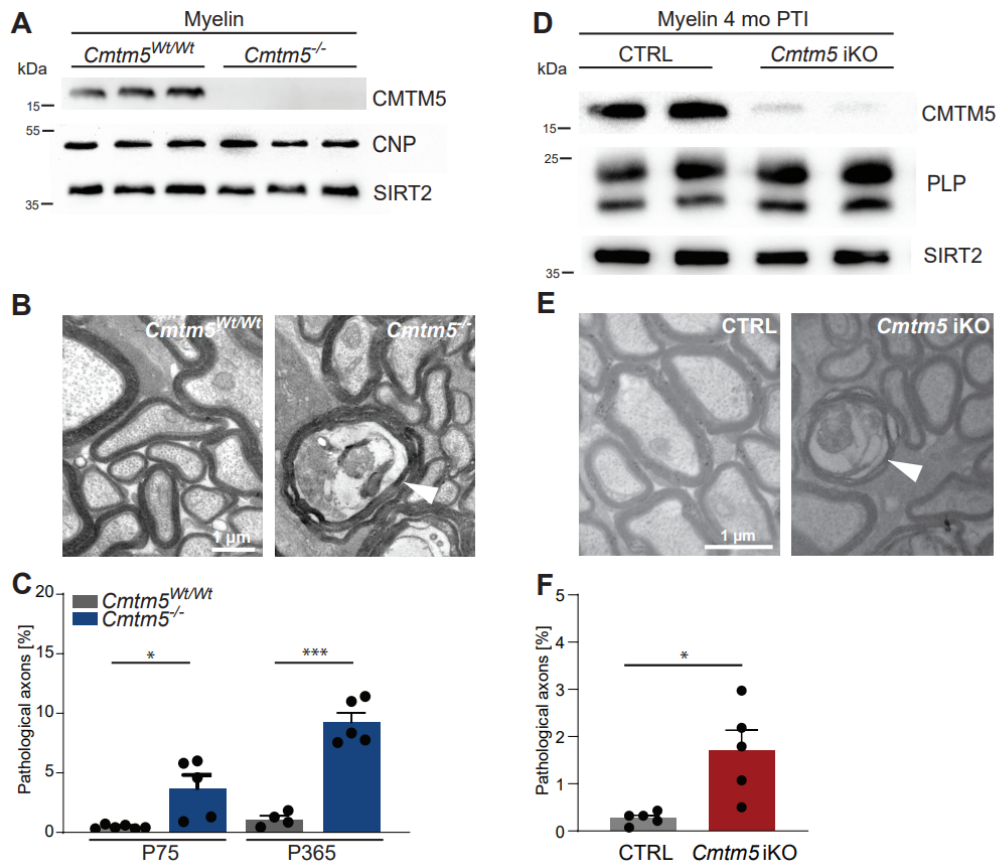

1447

1448

Buscham et al., Figure 6 Supplement 1

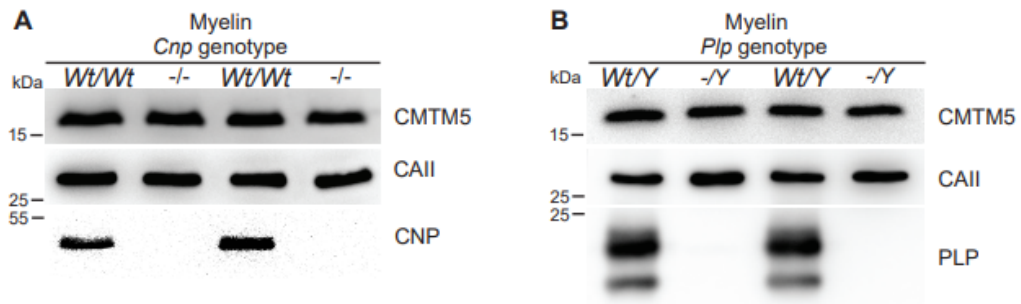

1449

1450



Buscham et al., Figure 7

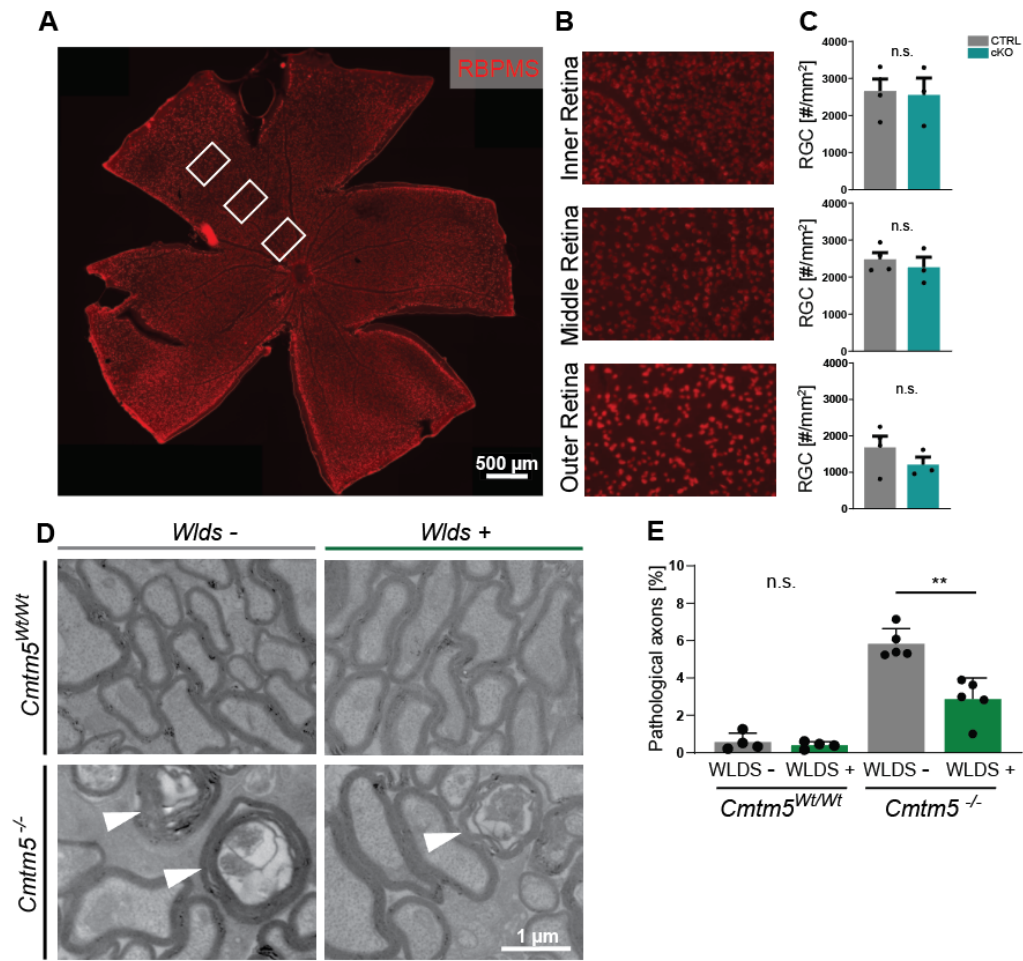

1451
